# Supplementary material
Source: PubMed Central journal article supplement (PMC5736301)
Supplement: NIHMS918364-supplement-Supplementary_Online_Content.pdf [file NIHMS918364-supplement-Supplementary_Online_Content.pdf]

## Supplementary Online Content

Donohoe MC, Sperling RA, Petersen R, Sun C-K, Weiner MW, Aisen PS; Alzheimer's Disease Neuroimaging Initiative. Association between elevated brain amyloid and subsequent cognitive decline among cognitively normal persons. *JAMA*. doi:10.1001/jama.2017.6669

**eTable 1.** Education Adjusted Logical Memory Thresholds for Defining EMCI and LMCI

**eTable 2.** Linear Mixed-Effects Model of PiB SUVR

**eTable 3.** Linear Mixed-Effects Model of Florbetapir SUVR

**eTable 4.** Linear Mixed-Effects Model of Ventricular Volume (mm<sup>3</sup>)

**eTable 5.** Summary Statistics for the Follow-up Time in Years

**eTable 6.** Participant Counts by Month and Last Known Participant Status

**eTable 7.** Characteristics by Last Known Follow-up Status

**eTable 8.** Quadratic Time Linear Mixed-Effects Model of PACC

**eTable 9.** Quadratic Time Linear Mixed-Effects Model of MMSE

**eTable 10.** Quadratic Time Linear Mixed-Effects Model of CDRSB

**eTable 11.** Quadratic Time Linear Mixed-Effects Model of Logical Memory

**eTable 12.** Quadratic Time Logistic Mixed-Effects Model of CDR-Global Progression to Scores Greater Than 0

**eTable 13.** Linear Time Logistic Mixed-Effects Model of CDR-Sum of Boxes Increase of More Than One Point

**eTable 14.** Linear Time Logistic Mixed-Effects Model of Progression to EMCI

**eTable 15.** Linear Time Logistic Mixed-Effects Model of Progression to LMCI

**eFigure 1.** Imputed Baseline Florbetapir SUVR

**eFigure 2.** Imputed Baseline PiB SUVR

**eFigure 3.** Imputed Baseline Ventricular Volumes

**eFigure 4.** Mean Cognitive Profiles Without Imputing Baseline Amyloid Status

**eFigure 5.** Progression Event Rates Without Imputing Amyloid Group

**eFigure 6.** Mean Cognitive Profiles Excluding Individuals With Subjective Memory Concerns at Baseline

**eFigure 7.** Progression Event Rates Excluding Individuals With Subjective Memory Concerns at Baseline

**eFigure 8.** Mean Cognitive Profiles Controlling for Age Only

**eFigure 9.** Progression Event Rates Controlling for Age Only

**eFigure 10.** PACC Change

**eFigure 11.** Logistic Mixed-Effects Models Controlling for Age

**eFigure 12.** Apolipoprotein E  $\epsilon$ 4 Allele Group Mean PACC Profiles for Those With Elevated Amyloid

**eFigure 13.** Logistic Mixed-Effects Model of Anti-Dementia Medication Use Controlling for Age

**eFigure 14.** Kaplan-Meier Plot of Cumulative Rate of Progression to Dementia

This supplementary material has been provided by the authors to give readers additional information about their work.

**eTable 1.** Education Adjusted Logical Memory Thresholds for Defining EMCI and LMCI

|                 |                          |                         |
|-----------------|--------------------------|-------------------------|
| $\leq 7$ years  | Logical Memory $\leq 6$  | Logical Memory $\leq 2$ |
| 8 to 15 years   | Logical Memory $\leq 9$  | Logical Memory $\leq 4$ |
| $\geq 16$ years | Logical Memory $\leq 11$ | Logical Memory $\leq 8$ |

Abbreviations: EMCI, Early Mild Cognitive Impairment; LMCI, Late Mild Cognitive Impairment.

**eTable 2.** Linear Mixed-Effects Model of PiB SUVR

| <b>Fixed effects</b>       |             |      |    |         | 95% confidence limits |       |         |   |
|----------------------------|-------------|------|----|---------|-----------------------|-------|---------|---|
|                            | Coefficient | SE   | DF | t-value | lower                 | upper | p-value |   |
| (Intercept)                | 0.57        | 1.50 | 29 | 0.38    | -2.50                 | 3.64  | 0.707   |   |
| Years                      | 0.04        | 0.01 | 29 | 2.65    | 0.01                  | 0.06  | 0.013   | * |
| Age [years]                | 0.01        | 0.02 | 15 | 0.59    | -0.03                 | 0.05  | 0.563   |   |
| <i>APOE</i> ε4             | 0.29        | 0.21 | 15 | 1.39    | -0.16                 | 0.74  | 0.185   |   |
| PACC                       | 0.07        | 0.20 | 15 | 0.32    | -0.37                 | 0.50  | 0.754   |   |
|                            |             |      |    |         |                       |       |         |   |
| Number of observations: 49 |             |      |    |         | <b>Random effects</b> |       |         |   |
| Number of individuals: 19  |             |      |    |         | SD                    |       |         |   |
|                            |             |      |    |         | (Intercept)           | 0.40  |         |   |
|                            |             |      |    |         | Residual              | 0.08  |         |   |

Abbreviations: PiB, Pittsburgh Compound B; SUVR, standardized uptake value ratio; SE, standard error; DF, degrees of freedom; SD, standard deviation; PACC, Preclinical Alzheimer Cognitive Composite; \* < 0.05.

**eTable 3.** Linear Mixed-Effects Model of Florbetapir SUVR

| <b>Fixed effects</b>        |             |      |     | 95% confidence limits |       |       |            |
|-----------------------------|-------------|------|-----|-----------------------|-------|-------|------------|
|                             | Coefficient | SE   | DF  | t-value               | lower | upper | p-value    |
| (Intercept)                 | 0.71        | 0.13 | 371 | 5.60                  | 0.46  | 0.96  | <0.001 *** |
| Years                       | 0.01        | 0.00 | 243 | 4.19                  | 0.00  | 0.01  | <0.001 *** |
| Age [years]                 | 0.00        | 0.00 | 371 | 2.87                  | 0.00  | 0.01  | 0.004 **   |
| APOEε4                      | 0.14        | 0.02 | 371 | 6.66                  | 0.10  | 0.18  | <0.001 *** |
| PACC                        | 0.00        | 0.02 | 371 | -0.29                 | -0.03 | 0.03  | 0.772      |
| Number of observations: 619 |             |      |     | <b>Random effects</b> |       |       |            |
| Number of individuals: 375  |             |      |     |                       |       | SD    |            |
|                             |             |      |     | (Intercept)           | 0.18  |       |            |
|                             |             |      |     | Residual              | 0.05  |       |            |

Abbreviations: SUVR, standardized uptake value ratio; SE, standard error; DF, degrees of freedom; SD, standard deviation; PACC, Preclinical Alzheimer Cognitive Composite; \*\* < 0.01; \*\*\* < 0.001.

**eTable 4.** Linear Mixed-Effects Model of Ventricular Volume (mm<sup>3</sup>)

| <b>Fixed effects</b>         |             |        |      | 95% confidence limits |        |             |            |
|------------------------------|-------------|--------|------|-----------------------|--------|-------------|------------|
|                              | Coefficient | SE     | DF   | t-value               | lower  | upper       | p-value    |
| (Intercept)                  | -12028      | 9831.8 | 1399 | -1.22                 | -31315 | 7258.74     | 0.221      |
| Years                        | 1612        | 65.8   | 1399 | 24.49                 | 1483   | 1740.83     | <0.001 *** |
| Age [years]                  | 633         | 131.5  | 432  | 4.81                  | 374    | 891.13      | <0.001 *** |
| APOE4>0                      | -3264       | 1655.9 | 432  | -1.97                 | -6519  | -9.43       | 0.049 *    |
| PACC                         | -1898       | 1178.1 | 432  | -1.61                 | -4214  | 417.53      | 0.108      |
| Number of observations: 1836 |             |        |      | <b>Random effects</b> |        |             |            |
| Number of individuals: 436   |             |        |      |                       | SD     | Correlation |            |
|                              |             |        |      | (Intercept)           | 17479  |             |            |
|                              |             |        |      | Years                 | 1087   | 0.63        |            |
|                              |             |        |      | Residual              | 1109   |             |            |

Abbreviations: SE, standard error; DF, degrees of freedom; SD, standard deviation; PACC, Preclinical Alzheimer Cognitive Composite; \* < 0.05; \*\*\* < 0.001.

**eTable 5.** Summary Statistics for the Follow-up Time in Years

| Variable                    | Group    | N   | Minimum | 1 <sup>st</sup> Quartile | Median | Mean | 3 <sup>rd</sup> Quartile | Maximum |
|-----------------------------|----------|-----|---------|--------------------------|--------|------|--------------------------|---------|
| PACC                        | Normal   | 243 | 0.00    | 2.01                     | 3.90   | 4.16 | 5.55                     | 10.10   |
|                             | Elevated | 202 | 0.00    | 2.01                     | 3.00   | 3.65 | 4.04                     | 10.30   |
|                             | Overall  | 445 | 0.00    | 2.01                     | 3.06   | 3.93 | 4.17                     | 10.30   |
| CDR                         | Normal   | 243 | 0.00    | 2.00                     | 3.08   | 4.11 | 6.02                     | 10.10   |
|                             | Elevated | 202 | 0.00    | 2.01                     | 2.99   | 3.68 | 4.04                     | 10.30   |
|                             | Overall  | 445 | 0.00    | 2.00                     | 3.01   | 3.91 | 4.14                     | 10.30   |
| Logical Memory              | Normal   | 243 | 0.00    | 2.01                     | 3.12   | 4.10 | 5.55                     | 10.10   |
|                             | Elevated | 202 | 0.00    | 2.01                     | 3.00   | 3.62 | 4.04                     | 10.30   |
|                             | Overall  | 445 | 0.00    | 2.01                     | 3.03   | 3.88 | 4.17                     | 10.30   |
| Florbetapir PET             | Normal   | 204 | 0.00    | 1.97                     | 2.02   | 3.15 | 4.08                     | 9.31    |
|                             | Elevated | 172 | 0.00    | 0.00                     | 2.01   | 2.55 | 2.45                     | 9.16    |
|                             | Overall  | 376 | 0.00    | 1.96                     | 2.01   | 2.88 | 4.02                     | 9.31    |
| FDG PET                     | Normal   | 228 | 0.00    | 0.00                     | 1.98   | 2.35 | 4.01                     | 8.03    |
|                             | Elevated | 191 | 0.00    | 0.00                     | 1.98   | 1.98 | 2.61                     | 7.99    |
|                             | Overall  | 419 | 0.00    | 0.00                     | 1.98   | 2.18 | 3.05                     | 8.03    |
| CSF A $\beta$ <sub>42</sub> | Normal   | 195 | 0.00    | 0.00                     | 0.00   | 1.20 | 1.99                     | 6.69    |
|                             | Elevated | 180 | 0.00    | 0.00                     | 0.00   | 1.12 | 1.99                     | 6.97    |
|                             | Overall  | 375 | 0.00    | 0.00                     | 0.00   | 1.16 | 1.99                     | 6.97    |
| CSF Tau                     | Normal   | 192 | 0.00    | 0.00                     | 0.00   | 1.17 | 1.98                     | 6.69    |
|                             | Elevated | 180 | 0.00    | 0.00                     | 0.00   | 1.11 | 1.99                     | 6.97    |
|                             | Overall  | 372 | 0.00    | 0.00                     | 0.00   | 1.14 | 1.99                     | 6.97    |

|                  |          |     |      |      |      |      |      |       |
|------------------|----------|-----|------|------|------|------|------|-------|
| CSF pTau         | Normal   | 194 | 0.00 | 0.00 | 0.00 | 1.09 | 1.99 | 6.69  |
|                  | Elevated | 180 | 0.00 | 0.00 | 0.00 | 1.03 | 1.99 | 6.97  |
|                  | Overall  | 374 | 0.00 | 0.00 | 0.00 | 1.06 | 1.99 | 6.97  |
| Hippocampal vol. | Normal   | 241 | 0.00 | 1.95 | 2.02 | 2.86 | 4.02 | 10.00 |
|                  | Elevated | 201 | 0.00 | 1.17 | 2.02 | 2.56 | 3.35 | 9.08  |
|                  | Overall  | 442 | 0.00 | 1.57 | 2.02 | 2.73 | 3.98 | 10.00 |
| Ventricular vol. | Normal   | 239 | 0.00 | 1.04 | 2.02 | 2.89 | 4.04 | 10.00 |
|                  | Elevated | 196 | 0.00 | 1.04 | 2.02 | 2.60 | 3.65 | 9.03  |
|                  | Overall  | 435 | 0.00 | 1.04 | 2.02 | 2.76 | 4.00 | 10.00 |

Abbreviations: PACC, Preclinical Alzheimer's Cognitive Composite; CDR, Clinical Dementia Rating; PET, positron emission tomography; FDG, fluorodeoxyglucose; CSF, cerebrospinal fluid; vol., volume.



**eTable 6.** Participant Counts by Month and Last Known Participant Status

| Month | Normal    |                   |         |           | Elevated  |                   |         |           | Overall   |                   |         |           |
|-------|-----------|-------------------|---------|-----------|-----------|-------------------|---------|-----------|-----------|-------------------|---------|-----------|
|       | Active    | Lost to follow-up | Death   | Sum       | Active    | Lost to follow-up | Death   | Sum       | Active    | Lost to follow-up | Death   | Sum       |
| 0     | 0 (0)     | 5 (6)             | 0 (0)   | 5 (2)     | 0 (0)     | 2 (2)             | 0 (0)   | 2 (1)     | 0 (0)     | 7 (4)             | 0 (0)   | 7 (1)     |
| 6     | 0 (0)     | 6 (7)             | 0 (0)   | 6 (2)     | 0 (0)     | 10 (12)           | 0 (0)   | 10 (4)    | 0 (0)     | 16 (10)           | 0 (0)   | 16 (3)    |
| 12    | 2 (1)     | 6 (7)             | 0 (0)   | 8 (3)     | 1 (1)     | 2 (2)             | 0 (0)   | 3 (1)     | 3 (1)     | 8 (5)             | 0 (0)   | 11 (2)    |
| 18    | 0 (0)     | 3 (4)             | 0 (0)   | 3 (1)     | 0 (0)     | 2 (2)             | 0 (0)   | 2 (1)     | 0 (0)     | 5 (3)             | 0 (0)   | 5 (1)     |
| 24    | 48 (30)   | 16 (20)           | 0 (0)   | 64 (17)   | 42 (35)   | 19 (24)           | 0 (0)   | 61 (19)   | 90 (32)   | 35 (22)           | 0 (0)   | 125 (18)  |
| 30    | 1 (1)     | 5 (6)             | 2 (67)  | 8 (24)    | 0 (0)     | 11 (14)           | 1 (100) | 12 (38)   | 1 (0)     | 16 (10)           | 3 (75)  | 20 (28)   |
| 36    | 15 (9)    | 12 (15)           | 0 (0)   | 27 (8)    | 8 (7)     | 14 (18)           | 0 (0)   | 22 (8)    | 23 (8)    | 26 (16)           | 0 (0)   | 49 (8)    |
| 42    | 0 (0)     | 4 (5)             | 0 (0)   | 4 (2)     | 0 (0)     | 2 (2)             | 0 (0)   | 2 (1)     | 0 (0)     | 6 (4)             | 0 (0)   | 6 (1)     |
| 48    | 49 (31)   | 1 (1)             | 0 (0)   | 50 (11)   | 44 (36)   | 2 (2)             | 0 (0)   | 46 (13)   | 93 (33)   | 3 (2)             | 0 (0)   | 96 (12)   |
| 54    | 0 (0)     | 3 (4)             | 1 (33)  | 4 (12)    | 0 (0)     | 2 (2)             | 0 (0)   | 2 (1)     | 0 (0)     | 5 (3)             | 1 (25)  | 6 (9)     |
| 60    | 0 (0)     | 0 (0)             | 0 (0)   | 0 (0)     | 1 (1)     | 0 (0)             | 0 (0)   | 1 (0)     | 1 (0)     | 0 (0)             | 0 (0)   | 1 (0)     |
| 66    | 0 (0)     | 1 (1)             | 0 (0)   | 1 (0)     | 0 (0)     | 1 (1)             | 0 (0)   | 1 (0)     | 0 (0)     | 2 (1)             | 0 (0)   | 2 (0)     |
| 72    | 0 (0)     | 0 (0)             | 0 (0)   | 0 (0)     | 0 (0)     | 2 (2)             | 0 (0)   | 2 (1)     | 0 (0)     | 2 (1)             | 0 (0)   | 2 (0)     |
| 78    | 0 (0)     | 3 (4)             | 0 (0)   | 3 (1)     | 0 (0)     | 2 (2)             | 0 (0)   | 2 (1)     | 0 (0)     | 5 (3)             | 0 (0)   | 5 (1)     |
| 84    | 0 (0)     | 6 (7)             | 0 (0)   | 6 (2)     | 0 (0)     | 4 (5)             | 0 (0)   | 4 (2)     | 0 (0)     | 10 (6)            | 0 (0)   | 10 (2)    |
| 90    | 0 (0)     | 2 (2)             | 0 (0)   | 2 (1)     | 0 (0)     | 1 (1)             | 0 (0)   | 1 (0)     | 0 (0)     | 3 (2)             | 0 (0)   | 3 (1)     |
| 96    | 8 (5)     | 7 (9)             | 0 (0)   | 15 (5)    | 5 (4)     | 3 (4)             | 0 (0)   | 8 (3)     | 13 (5)    | 10 (6)            | 0 (0)   | 23 (4)    |
| 108   | 25 (16)   | 1 (1)             | 0 (0)   | 26 (6)    | 12 (10)   | 1 (1)             | 0 (0)   | 13 (4)    | 37 (13)   | 2 (1)             | 0 (0)   | 39 (5)    |
| 120   | 10 (6)    | 1 (1)             | 0 (0)   | 11 (3)    | 8 (7)     | 0 (0)             | 0 (0)   | 8 (2)     | 18 (6)    | 1 (1)             | 0 (0)   | 19 (2)    |
| Sum   | 158 (100) | 82 (100)          | 3 (100) | 243 (100) | 121 (100) | 80 (100)          | 1 (100) | 202 (100) | 279 (100) | 162 (100)         | 4 (100) | 445 (100) |

Numbers in parentheses are percentages.

**eTable 7.** Characteristics by Last Known Follow-up Status

|                                    |     | Not Active at last follow-up<br>(N=166) | Active at last follow-up<br>(N=279) | Combined<br>(N=445) | P-value |
|------------------------------------|-----|-----------------------------------------|-------------------------------------|---------------------|---------|
| <b>Baseline Characteristics</b>    |     |                                         |                                     |                     |         |
| Age [years]                        | 445 | 75.15 (5.91)                            | 73.26 (5.74)                        | 74.0 (5.9)          | 0.001   |
| Female                             | 445 | 80 (48%)                                | 153 (55%)                           | 233 (52%)           | 0.12    |
| Education [years]                  | 445 | 16.37 (2.66)                            | 16.41 (2.69)                        | 16.4 (2.7)          | 0.86    |
| Family history of dementia         | 445 | 62 (37%)                                | 113 (41%)                           | 175 (39%)           | 0.51    |
| Ethnicity: Not Hispanic/Latino     | 445 | 162 (98%)                               | 264 (95%)                           | 426 (96%)           | 0.23    |
| Hispanic/Latino                    |     | 4 (2%)                                  | 12 (4%)                             | 16 (4%)             |         |
| Unknown                            |     | 0 (0%)                                  | 3 (1%)                              | 3 (1%)              |         |
| Race: American Indian/Alaskan      | 445 | 0 (0%)                                  | 1 (0%)                              | 1 (0.2%)            | 0.18    |
| Asian                              |     | 2 (1%)                                  | 4 (1%)                              | 6 (1%)              |         |
| Black                              |     | 14 (8%)                                 | 15 (5%)                             | 29 (7%)             |         |
| White                              |     | 146 (88%)                               | 258 (92%)                           | 404 (91%)           |         |
| More than one                      |     | 4 (2%)                                  | 1 (0%)                              | 5 (1%)              |         |
| Subjective memory concern          | 445 | 18 (11%)                                | 86 (31%)                            | 104 (23%)           | <0.001  |
| At least one APOEε4 allele         | 444 | 46 (28%)                                | 79 (28%)                            | 125 (28%)           | 0.89    |
| PACC                               | 445 | -0.32 (2.5)                             | 0.17 (2.6)                          | 0.00 (0.65)         | 0.05    |
| Mini-Mental State Exam             | 445 | 29.03 (1.08)                            | 29.05 (1.23)                        | 29.0 (1.2)          | 0.83    |
| Logical Memory Delayed Recall      | 445 | 13.10 (3.39)                            | 13.18 (3.18)                        | 13.1 (3.3)          | 0.80    |
| ADAS13                             | 445 | 9.80 (4.29)                             | 8.87 (4.31)                         | 9.2 (4.3)           | 0.03    |
| CDR-SB: 0                          | 445 | 154 (93%)                               | 259 (93%)                           | 413 (93%)           | 0.42    |
| 0.5                                |     | 11 (7%)                                 | 20 (7%)                             | 31 (7%)             |         |
| 1                                  |     | 1 (1%)                                  | 0 (0%)                              | 1 (0.2%)            |         |
| Ventricular volume [% ICV]         | 435 | 2.337 (1.187)                           | 2.121 (0.999)                       | 2.2 (1.1)           | 0.05    |
| CSF Tau [pg/ml]                    | 369 | 68.1 (32.2)                             | 67.6 (32.5)                         | 67.8 (32.3)         | 0.89    |
| CSF pTau [pg/ml]                   | 371 | 30.9 (20.4)                             | 32.7 (17.4)                         | 32.1 (18.6)         | 0.39    |
| CSF Aβ <sub>42</sub> : < 192 pg/ml | 372 | 65 (47%)                                | 90 (38%)                            | 155 (42%)           | 0.08    |
| CSF Aβ <sub>42</sub> [pg/ml]       | 372 | 197.5 (57.3)                            | 201.4 (48.2)                        | 200.0 (51.7)        | 0.50    |
| Amyloid PET [SUVR]: > 1.1          | 385 | 41 (36%)                                | 97 (36%)                            | 138 (36%)           | 0.91    |
| Amyloid PET [SUVR]                 | 385 | 1.1 (0.16)                              | 1.1 (0.19)                          | 1.11 (0.18)         | 0.21    |
| Elevated amyloid by PET or CSF     | 445 | 81 (49%)                                | 121 (43%)                           | 202 (45%)           | 0.27    |

**eTable 7.** *continued*

Counts (%) or mean (SD) are provided for each variable at baseline. Elevated brain amyloid is defined as baseline amyloid PET SUVR > 1.1 or CSF A $\beta$  < 192 pg/ml. Status is defined as “Active” if the participant has not been reported lost to follow-up or deceased. P-values are based on two-sample t-tests or Pearson Chi-squared tests. The PACC is a sum of four baseline standardized Z-scores which decreases with worse performance.

The MMSE ranges from zero (worst) to 30 (best) points, Logical Memory Delayed Recall range from zero (worst) to 25 (best) story units, ADAS13 ranges from zero (best) to 85 (worst), and the CDRSB ranges from zero (best) to 18 (worst) points. Anti-dementia medications included donepezil, tacrine, rivastigmine, memantine, or galantamine.

Abbreviations: PACC, Preclinical Alzheimer’s Cognitive Composite; ADAS13, Alzheimer’s Disease Assessment Scale 13 item cognitive subscale; CDR-SB, Clinical Dementia Rating Sum of Boxes; ICV, intracranial volume; CSF, cerebrospinal fluid; pTau, phospho-tau; PET, positron emission tomography; SUVR, standard uptake value ratio.

**eTable 8.** Quadratic Time Linear Mixed-Effects Model of PACC

| <b>Fixed effects</b>           |             |                |                       |                       |             |             |         |     |
|--------------------------------|-------------|----------------|-----------------------|-----------------------|-------------|-------------|---------|-----|
|                                | Coefficient | SE             | DF                    | t-statistic           | p-value     |             |         |     |
| <i>APOEε4</i>                  | 0.38        | 0.24           | 427                   | -1.58                 |             |             |         |     |
| Age                            | -0.10       | 0.02           | 427                   | -5.32                 | <0.001      | ***         |         |     |
| Female                         | 1.17        | 0.21           | 427                   | 5.32                  | <0.001      | ***         |         |     |
| Education                      | 0.27        | 0.04           | 427                   | 6.88                  | <0.001      | ***         |         |     |
| Ventricular volume             | -0.19       | 0.10           | 427                   | -2.07                 | 0.039       | *           |         |     |
| Family history                 | 0.33        | 0.22           | 427                   | 1.53                  | 0.126       |             |         |     |
| <b>Amyloid Group Contrasts</b> |             |                | 95% confidence limits |                       |             |             |         |     |
| Years                          | Contrast    | SE             | lower                 | upper                 | t-statistic | DF          | P-value |     |
| 0                              | -0.39       | 0.22           | -0.83                 | 0.04                  | -1.77       | 2306        | 0.076   | .   |
| 0.5                            | -0.41       | 0.22           | -0.84                 | 0.02                  | -1.85       | 2306        | 0.064   | .   |
| 1                              | -0.46       | 0.22           | -0.90                 | -0.03                 | -2.08       | 2306        | 0.038   | *   |
| 2                              | -0.67       | 0.23           | -1.12                 | -0.22                 | -2.93       | 2306        | 0.003   | **  |
| 3                              | -1.02       | 0.25           | -1.51                 | -0.53                 | -4.10       | 2306        | <0.001  | *** |
| 4                              | -1.51       | 0.29           | -2.08                 | -0.94                 | -5.21       | 2306        | <0.001  | *** |
| 5                              | -2.14       | 0.36           | -2.84                 | -1.44                 | -6.00       | 2306        | <0.001  | *** |
| 6                              | -2.92       | 0.45           | -3.80                 | -2.03                 | -6.46       | 2306        | <0.001  | *** |
| 7                              | -3.83       | 0.57           | -4.95                 | -2.71                 | -6.70       | 2306        | <0.001  | *** |
| 8                              | -4.88       | 0.71           | -6.28                 | -3.48                 | -6.83       | 2306        | <0.001  | *** |
| 9                              | -6.07       | 0.88           | -7.80                 | -4.34                 | -6.89       | 2306        | <0.001  | *** |
| 10                             | -7.40       | 1.07           | -9.50                 | -5.30                 | -6.92       | 2306        | <0.001  | *** |
|                                |             |                |                       |                       |             |             |         |     |
| AIC                            | BIC         | Log-likelihood |                       | <b>Random effects</b> |             |             |         |     |
| 10371                          | 10457       | -5171          |                       |                       | SD          | Correlation |         |     |
|                                |             |                |                       |                       | (Intercept) | 1.79        |         |     |
|                                |             |                |                       |                       | Years       | 0.58        | 0.25    |     |
|                                |             |                |                       |                       | Residual    | 1.71        |         |     |

Abbreviations: PACC, Preclinical Alzheimer's Cognitive Composite; SE, standard error; DF, degrees of freedom; SD, standard deviation; AIC, Akaike Information Criterion; BIC, Bayesian Information Criterion; \* <0.05; \*\* < 0.01; \*\*\* < 0.001.

**eTable 9.** Quadratic Time Linear Mixed-Effects Model of MMSE

| <b>Fixed effects</b>           |             |                |                       |                       |             |             |         |     |
|--------------------------------|-------------|----------------|-----------------------|-----------------------|-------------|-------------|---------|-----|
|                                | Coefficient | SE             | DF                    | t-statistic           | p-value     |             |         |     |
| Age                            | -0.02       | 0.01           | 440                   | -3.37                 | <0.001      | ***         |         |     |
| Female                         | 0.33        | 0.08           | 440                   | 3.93                  | <0.001      | ***         |         |     |
| Education                      | 0.07        | 0.02           | 440                   | 4.23                  | <0.001      | ***         |         |     |
| <b>Amyloid Group Contrasts</b> |             |                | 95% confidence limits |                       |             |             |         |     |
| Years                          | Contrast    | SE             | lower                 | upper                 | t-statistic | DF          | P-value |     |
| 0                              | -0.05       | 0.08           | -0.21                 | 0.12                  | -0.54       | 2341        | 0.588   |     |
| 0.5                            | -0.05       | 0.08           | -0.22                 | 0.11                  | -0.64       | 2341        | 0.522   |     |
| 1                              | -0.08       | 0.08           | -0.24                 | 0.09                  | -0.93       | 2341        | 0.351   |     |
| 2                              | -0.17       | 0.08           | -0.34                 | -0.01                 | -2.06       | 2341        | 0.039   | *   |
| 3                              | -0.34       | 0.09           | -0.52                 | -0.15                 | -3.55       | 2341        | <0.001  | *** |
| 4                              | -0.56       | 0.12           | -0.80                 | -0.32                 | -4.66       | 2341        | <0.001  | *** |
| 5                              | -0.85       | 0.16           | -1.17                 | -0.53                 | -5.20       | 2341        | <0.001  | *** |
| 6                              | -1.21       | 0.22           | -1.64                 | -0.77                 | -5.41       | 2341        | <0.001  | *** |
| 7                              | -1.62       | 0.30           | -2.21                 | -1.04                 | -5.48       | 2341        | <0.001  | *** |
| 8                              | -2.11       | 0.38           | -2.86                 | -1.36                 | -5.50       | 2341        | <0.001  | *** |
| 9                              | -2.66       | 0.48           | -3.60                 | -1.71                 | -5.50       | 2341        | <0.001  | *** |
| 10                             | -3.27       | 0.60           | -4.44                 | -2.10                 | -5.49       | 2341        | <0.001  | *** |
|                                |             |                |                       |                       |             |             |         |     |
| AIC                            | BIC         | Log-likelihood |                       | <b>Random effects</b> |             |             |         |     |
| 8054                           | 8123        | -4015          |                       |                       | SD          | Correlation |         |     |
|                                |             |                |                       | (Intercept)           | 0.64        |             |         |     |
|                                |             |                |                       | Years                 | 0.28        | -0.23       |         |     |
|                                |             |                |                       | Residual              | 1.14        |             |         |     |

Abbreviations: MMSE, Mini-Mental State Exam; SE, standard error; DF, degrees of freedom; SD, standard deviation; AIC, Akaike Information Criterion; BIC, Bayesian Information Criterion; \* <0.05; \*\* < 0.01; \*\*\* < 0.001.

**eTable 10.** Quadratic Time Linear Mixed-Effects Model of CDRSB

| <b>Fixed effects</b>           |             |                |                       |         |                                          |      |         |     |
|--------------------------------|-------------|----------------|-----------------------|---------|------------------------------------------|------|---------|-----|
|                                | Coefficient | SE             | t-statistic           | p-value |                                          |      |         |     |
| Age                            | 0.00        | 0.00           | 0.26                  | 0.798   |                                          |      |         |     |
| <b>Amyloid Group Contrasts</b> |             |                | 95% confidence limits |         |                                          |      |         |     |
| Years                          | Contrast    | SE             | lower                 | upper   | t-statistic                              | DF   | P-value |     |
| 0                              | 0.01        | 0.01           | -0.02                 | 0.03    | 0.47                                     | 2331 | 0.641   |     |
| 0.5                            | -0.01       | 0.02           | -0.05                 | 0.03    | -0.53                                    | 2331 | 0.596   |     |
| 1                              | -0.02       | 0.03           | -0.07                 | 0.04    | -0.51                                    | 2331 | 0.607   |     |
| 2                              | 0.02        | 0.05           | -0.08                 | 0.11    | 0.32                                     | 2331 | 0.749   |     |
| 3                              | 0.10        | 0.06           | -0.02                 | 0.22    | 1.61                                     | 2331 | 0.107   |     |
| 4                              | 0.23        | 0.08           | 0.08                  | 0.38    | 3.07                                     | 2331 | 0.002   | **  |
| 5                              | 0.42        | 0.10           | 0.23                  | 0.62    | 4.30                                     | 2331 | <0.001  | *** |
| 6                              | 0.66        | 0.13           | 0.41                  | 0.92    | 5.07                                     | 2331 | <0.001  | *** |
| 7                              | 0.96        | 0.18           | 0.61                  | 1.30    | 5.45                                     | 2331 | <0.001  | *** |
| 8                              | 1.31        | 0.23           | 0.85                  | 1.76    | 5.60                                     | 2331 | <0.001  | *** |
| 9                              | 1.71        | 0.30           | 1.11                  | 2.30    | 5.63                                     | 2331 | <0.001  | *** |
| 10                             | 2.16        | 0.38           | 1.40                  | 2.91    | 5.61                                     | 2331 | <0.001  | *** |
|                                |             |                |                       |         |                                          |      |         |     |
| AIC                            | BIC         | Log-likelihood |                       |         | Compound symmetry correlation rho = 0.49 |      |         |     |
| 2755                           | 2870        | -1357          |                       |         | Residual standard error 0.15             |      |         |     |

Heterogeneous variance parameters per month:

|   |      |      |      |      |      |      |      |       |       |       |       |
|---|------|------|------|------|------|------|------|-------|-------|-------|-------|
| 0 | 6    | 12   | 24   | 36   | 48   | 60   | 72   | 84    | 96    | 108   | 120   |
| 1 | 2.18 | 3.14 | 3.94 | 5.68 | 5.31 | 5.56 | 7.49 | 15.94 | 16.46 | 24.09 | 20.99 |

Abbreviations: CDRSB, Clinical Dementia Rating Sum of Boxes; SE, standard error; DF, degrees of freedom; SD, standard deviation; AIC, Akaike Information Criterion; BIC, Bayesian Information Criterion; \* <0.05; \*\* < 0.01; \*\*\* < 0.001.

**eTable 11.** Quadratic Time Linear Mixed-Effects Model of Logical Memory

| <b>Fixed effects</b>           |             |                |                       |                       |             |             |         |
|--------------------------------|-------------|----------------|-----------------------|-----------------------|-------------|-------------|---------|
|                                | Coefficient | SE             | DF                    | t-statistic           | p-value     |             |         |
| <i>APOEε4</i>                  | -0.58       | 0.35           | 428                   | -1.66                 | 0.097       | .           |         |
| Age                            | -0.04       | 0.03           | 428                   | -1.57                 | 0.117       |             |         |
| Female                         | 1.16        | 0.31           | 428                   | 3.71                  | <0.001      | ***         |         |
| Education                      | 0.38        | 0.06           | 428                   | 6.71                  | <0.001      | ***         |         |
| Ventricular volume             | -0.25       | 0.15           | 428                   | -1.69                 | 0.091       | .           |         |
| <b>Amyloid Group Contrasts</b> |             |                | 95% confidence limits |                       |             |             |         |
| Years                          | Contrast    | SE             | lower                 | upper                 | t-statistic | DF          | P-value |
| 0                              | -0.12       | 0.32           | -0.75                 | 0.51                  | -0.38       | 1879        | 0.704   |
| 1                              | -0.16       | 0.32           | -0.79                 | 0.47                  | -0.50       | 1879        | 0.619   |
| 2                              | -0.27       | 0.33           | -0.92                 | 0.37                  | -0.84       | 1879        | 0.402   |
| 3                              | -0.47       | 0.34           | -1.14                 | 0.21                  | -1.35       | 1879        | 0.177   |
| 4                              | -0.73       | 0.38           | -1.48                 | 0.02                  | -1.91       | 1879        | 0.056   |
| 5                              | -1.07       | 0.45           | -1.96                 | -0.19                 | -2.39       | 1879        | 0.017   |
| 6                              | -1.49       | 0.55           | -2.57                 | -0.41                 | -2.72       | 1879        | 0.007   |
| 7                              | -1.99       | 0.68           | -3.33                 | -0.65                 | -2.91       | 1879        | 0.004   |
| 8                              | -2.56       | 0.85           | -4.22                 | -0.90                 | -3.03       | 1879        | 0.002   |
| 9                              | -3.21       | 1.04           | -5.24                 | -1.18                 | -3.10       | 1879        | 0.002   |
| 10                             | -3.93       | 1.25           | -6.39                 | -1.47                 | -3.14       | 1879        | 0.002   |
|                                |             |                |                       |                       |             |             |         |
| AIC                            | BIC         | Log-likelihood |                       | <b>Random effects</b> |             |             |         |
| 9715                           | 9793        | -4844          |                       |                       | SD          | Correlation |         |
|                                |             |                |                       | (Intercept)           | 2.58        |             |         |
|                                |             |                |                       | Years                 | 0.55        | 0.24        |         |
|                                |             |                |                       | Residual              | 2.38        |             |         |

Abbreviations: SE, standard error; DF, degrees of freedom; SD, standard deviation; AIC, Akaike Information Criterion; BIC, Bayesian Information Criterion; \* <0.05; \*\* < 0.01; \*\*\* < 0.001.

**eTable 12.** Quadratic Time Logistic Mixed-Effects Model of CDR-Global Progression to Scores Greater Than 0

| <b>Fixed effects</b>          |             |       |                       |         |    |                       |      |                |
|-------------------------------|-------------|-------|-----------------------|---------|----|-----------------------|------|----------------|
|                               | Coefficient | SE    | z-statistic           | p-value |    |                       |      |                |
| Age                           | 0.01        | 0.03  | 0.35                  | 0.724   |    |                       |      |                |
| Ventricular volume            | 0.57        | 0.18  | 3.13                  | 0.002   | ** |                       |      |                |
| <b>Amyloid Group Profiles</b> |             |       | 95% confidence limits |         |    |                       |      |                |
| Year                          | Group       | Rate  | lower                 | upper   |    |                       |      |                |
| 0                             | Elevated    | 2.14  | 0.47                  | 3.81    |    |                       |      |                |
|                               | Normal      | 2.40  | 0.95                  | 3.84    |    | AIC                   | BIC  | Log-likelihood |
| 1                             | Elevated    | 6.43  | 3.78                  | 9.09    |    | 1270                  | 1321 | -626           |
|                               | Normal      | 4.80  | 2.84                  | 6.76    |    |                       |      |                |
| 2                             | Elevated    | 13.45 | 9.51                  | 17.39   |    |                       |      |                |
|                               | Normal      | 8.01  | 5.39                  | 10.63   |    | <b>Random effects</b> |      |                |
| 3                             | Elevated    | 22.18 | 16.50                 | 27.86   |    |                       | SD   |                |
|                               | Normal      | 11.63 | 8.21                  | 15.06   |    | (Intercept)           | 2.78 |                |
| 4                             | Elevated    | 32.23 | 24.27                 | 40.20   |    |                       |      |                |
|                               | Normal      | 15.31 | 10.99                 | 19.63   |    |                       |      |                |
| 5                             | Elevated    | 43.93 | 33.55                 | 54.30   |    |                       |      |                |
|                               | Normal      | 18.84 | 13.58                 | 24.11   |    |                       |      |                |
| 6                             | Elevated    | 56.59 | 44.71                 | 68.46   |    |                       |      |                |
|                               | Normal      | 22.16 | 15.92                 | 28.39   |    |                       |      |                |
| 7                             | Elevated    | 68.18 | 56.00                 | 80.37   |    |                       |      |                |
|                               | Normal      | 25.11 | 17.75                 | 32.48   |    |                       |      |                |
| 8                             | Elevated    | 77.25 | 65.20                 | 89.31   |    |                       |      |                |
|                               | Normal      | 27.49 | 18.46                 | 36.52   |    |                       |      |                |
| 9                             | Elevated    | 83.72 | 71.46                 | 95.98   |    |                       |      |                |
|                               | Normal      | 29.01 | 17.38                 | 40.64   |    |                       |      |                |
| 10                            | Elevated    | 88.21 | 74.98                 | 100.00  |    |                       |      |                |
|                               | Normal      | 29.43 | 14.16                 | 44.70   |    |                       |      |                |

Abbreviations: CDR, Clinical Dementia Rating; SE, standard error; DF, degrees of freedom; SD, standard deviation; AIC, Akaike Information Criterion; BIC, Bayesian Information Criterion; \* <0.05; \*\* < 0.01; \*\*\* < 0.001.



**eTable 13.** Linear Time Logistic Mixed-Effects Model of CDR-Sum of Boxes Increase of More Than One Point

| <b>Fixed effects</b>          |             |       |                       |         |    |                       |     |                |
|-------------------------------|-------------|-------|-----------------------|---------|----|-----------------------|-----|----------------|
|                               | Coefficient | SE    | z-statistic           | p-value |    |                       |     |                |
| Age                           | 0.02        | 0.04  | 0.46                  | 0.643   |    |                       |     |                |
| Ventricular volume            | 0.69        | 0.22  | 3.16                  | 0.002   | ** |                       |     |                |
| <b>Amyloid Group Profiles</b> |             |       | 95% confidence limits |         |    |                       |     |                |
| Year                          | Group       | Rate  | lower                 | upper   |    |                       |     |                |
| 0                             | Elevated    | 0.89  | 0.00                  | 2.21    |    |                       |     |                |
|                               | Normal      | 1.62  | 0.52                  | 2.72    |    |                       |     |                |
| 1                             | Elevated    | 2.40  | 0.42                  | 4.38    |    |                       |     |                |
|                               | Normal      | 2.50  | 1.13                  | 3.87    |    |                       |     |                |
| 2                             | Elevated    | 5.23  | 2.46                  | 8.00    |    | AIC                   | BIC | Log-likelihood |
|                               | Normal      | 3.67  | 1.98                  | 5.35    |    | 924                   | 965 | -455           |
| 3                             | Elevated    | 9.36  | 5.62                  | 13.09   |    |                       |     |                |
|                               | Normal      | 5.13  | 3.09                  | 7.18    |    |                       |     |                |
| 4                             | Elevated    | 14.48 | 9.37                  | 19.58   |    | <b>Random effects</b> |     |                |
|                               | Normal      | 6.87  | 4.39                  | 9.35    |    | (Intercept)           | SD  |                |
| 5                             | Elevated    | 20.96 | 13.41                 | 28.51   |    |                       |     |                |
|                               | Normal      | 8.85  | 5.81                  | 11.89   |    |                       |     |                |
| 6                             | Elevated    | 30.60 | 18.73                 | 42.47   |    |                       |     |                |
|                               | Normal      | 11.07 | 7.23                  | 14.91   |    |                       |     |                |
| 7                             | Elevated    | 45.52 | 28.35                 | 62.68   |    |                       |     |                |
|                               | Normal      | 13.65 | 8.58                  | 18.71   |    |                       |     |                |
| 8                             | Elevated    | 64.13 | 44.63                 | 83.62   |    |                       |     |                |
|                               | Normal      | 16.85 | 9.83                  | 23.88   |    |                       |     |                |
| 9                             | Elevated    | 80.28 | 63.41                 | 97.15   |    |                       |     |                |
|                               | Normal      | 21.15 | 11.10                 | 31.19   |    |                       |     |                |
| 10                            | Elevated    | 90.43 | 78.57                 | 100.00  |    |                       |     |                |
|                               | Normal      | 27.14 | 12.84                 | 41.43   |    |                       |     |                |

Abbreviations: CDR, Clinical Dementia Rating; SE, standard error; DF, degrees of freedom; SD, standard deviation; AIC, Akaike Information Criterion; BIC, Bayesian Information Criterion; \* <0.05; \*\* < 0.01; \*\*\* < 0.001.

**eTable 14.** Linear Time Logistic Mixed-Effects Model of Progression to EMCI

| <b>Fixed effects</b>          |             |       |                       |         |   |                       |                |
|-------------------------------|-------------|-------|-----------------------|---------|---|-----------------------|----------------|
|                               | Coefficient | SE    | z-statistic           | p-value |   |                       |                |
| Age                           | 0.15        | 0.06  | 2.35                  | 0.019   | * |                       |                |
| Ventricular volume            | 0.69        | 0.31  | 2.24                  | 0.025   | * |                       |                |
| <b>Amyloid Group Profiles</b> |             |       | 95% confidence limits |         |   |                       |                |
| Year                          | Group       | Rate  | lower                 | upper   |   |                       |                |
| 0                             | Elevated    | 0.77  | 0.00                  | 1.74    |   |                       |                |
|                               | Normal      | 0.41  | 0.00                  | 1.13    |   |                       |                |
| 1                             | Elevated    | 1.96  | 0.47                  | 3.44    |   |                       |                |
|                               | Normal      | 0.80  | 0.00                  | 1.73    |   | AIC                   | BIC            |
| 2                             | Elevated    | 3.87  | 1.81                  | 5.94    |   | 602                   | 641            |
|                               | Normal      | 1.39  | 0.23                  | 2.54    |   |                       | Log-likelihood |
| 3                             | Elevated    | 6.32  | 3.62                  | 9.02    |   |                       | -294           |
|                               | Normal      | 2.12  | 0.72                  | 3.53    |   | <b>Random effects</b> |                |
| 4                             | Elevated    | 9.18  | 5.71                  | 12.66   |   |                       | SD             |
|                               | Normal      | 2.95  | 1.27                  | 4.62    |   | (Intercept)           | 3.83           |
| 5                             | Elevated    | 12.50 | 7.72                  | 17.28   |   |                       |                |
|                               | Normal      | 3.81  | 1.84                  | 5.78    |   |                       |                |
| 6                             | Elevated    | 16.94 | 9.16                  | 24.73   |   |                       |                |
|                               | Normal      | 4.70  | 2.35                  | 7.05    |   |                       |                |
| 7                             | Elevated    | 24.84 | 10.58                 | 39.11   |   |                       |                |
|                               | Normal      | 5.69  | 2.78                  | 8.60    |   |                       |                |
| 8                             | Elevated    | 39.87 | 16.84                 | 62.90   |   |                       |                |
|                               | Normal      | 6.89  | 3.02                  | 10.76   |   |                       |                |
| 9                             | Elevated    | 61.62 | 34.49                 | 88.76   |   |                       |                |
|                               | Normal      | 8.46  | 2.80                  | 14.11   |   |                       |                |
| 10                            | Elevated    | 80.84 | 57.44                 | 100.00  |   |                       |                |
|                               | Normal      | 10.59 | 1.59                  | 19.58   |   |                       |                |

Abbreviations: EMCI, Early Mild Cognitive Impairment; SE, standard error; DF, degrees of freedom; SD, standard deviation; AIC, Akaike Information Criterion; BIC, Bayesian Information Criterion; \* <0.05; \*\* < 0.01; \*\*\* < 0.001.

**eTable 15.** Linear Time Logistic Mixed-Effects Model of Progression to LMCI

| <b>Fixed effects</b>          |             |       |                       |         |   |                       |                |
|-------------------------------|-------------|-------|-----------------------|---------|---|-----------------------|----------------|
|                               | Coefficient | SE    | z-statistic           | p-value |   |                       |                |
| Age                           | 0.21        | 0.10  | 2.15                  | 0.031   | * |                       |                |
| Education                     | 0.28        | 0.19  | 1.43                  | 0.152   |   |                       |                |
| <b>Amyloid Group Profiles</b> |             |       | 95% confidence limits |         |   |                       |                |
| Year                          | Group       | Rate  | lower                 | upper   |   |                       |                |
| 0                             | Elevated    | 0.00  | 0.00                  | 0.50    |   |                       |                |
|                               | Normal      | 0.16  | 0.00                  | 0.66    |   | AIC                   | BIC            |
| 1                             | Elevated    | 0.10  | 0.00                  | 1.09    |   | 358                   | 397            |
|                               | Normal      | 0.37  | 0.00                  | 1.02    |   |                       | Log-likelihood |
| 2                             | Elevated    | 0.86  | 0.00                  | 2.30    |   |                       |                |
|                               | Normal      | 0.70  | 0.00                  | 1.51    |   | <b>Random effects</b> |                |
| 3                             | Elevated    | 2.20  | 0.30                  | 4.11    |   |                       | SD             |
|                               | Normal      | 1.11  | 0.13                  | 2.10    |   | (Intercept)           | 4.82           |
| 4                             | Elevated    | 3.88  | 1.48                  | 6.28    |   |                       |                |
|                               | Normal      | 1.56  | 0.39                  | 2.73    |   |                       |                |
| 5                             | Elevated    | 5.83  | 2.87                  | 8.79    |   |                       |                |
|                               | Normal      | 2.00  | 0.64                  | 3.36    |   |                       |                |
| 6                             | Elevated    | 7.58  | 3.63                  | 11.54   |   |                       |                |
|                               | Normal      | 2.45  | 0.90                  | 4.00    |   |                       |                |
| 7                             | Elevated    | 9.11  | 2.34                  | 15.88   |   |                       |                |
|                               | Normal      | 2.93  | 1.17                  | 4.68    |   |                       |                |
| 8                             | Elevated    | 12.06 | 0.00                  | 26.77   |   |                       |                |
|                               | Normal      | 3.43  | 1.42                  | 5.44    |   |                       |                |
| 9                             | Elevated    | 21.55 | 0.00                  | 50.13   |   |                       |                |
|                               | Normal      | 3.89  | 1.50                  | 6.28    |   |                       |                |
| 10                            | Elevated    | 46.57 | 7.78                  | 85.36   |   |                       |                |
|                               | Normal      | 4.23  | 1.11                  | 7.36    |   |                       |                |

Abbreviations: LMCI, Late Mild Cognitive Impairment; SE, standard error; DF, degrees of freedom; SD, standard deviation; AIC, Akaike Information Criterion; BIC, Bayesian Information Criterion; \* <0.05; \*\* < 0.01; \*\*\* < 0.001.

**eFigure 1.** Imputed Baseline Florbetapir SUVR

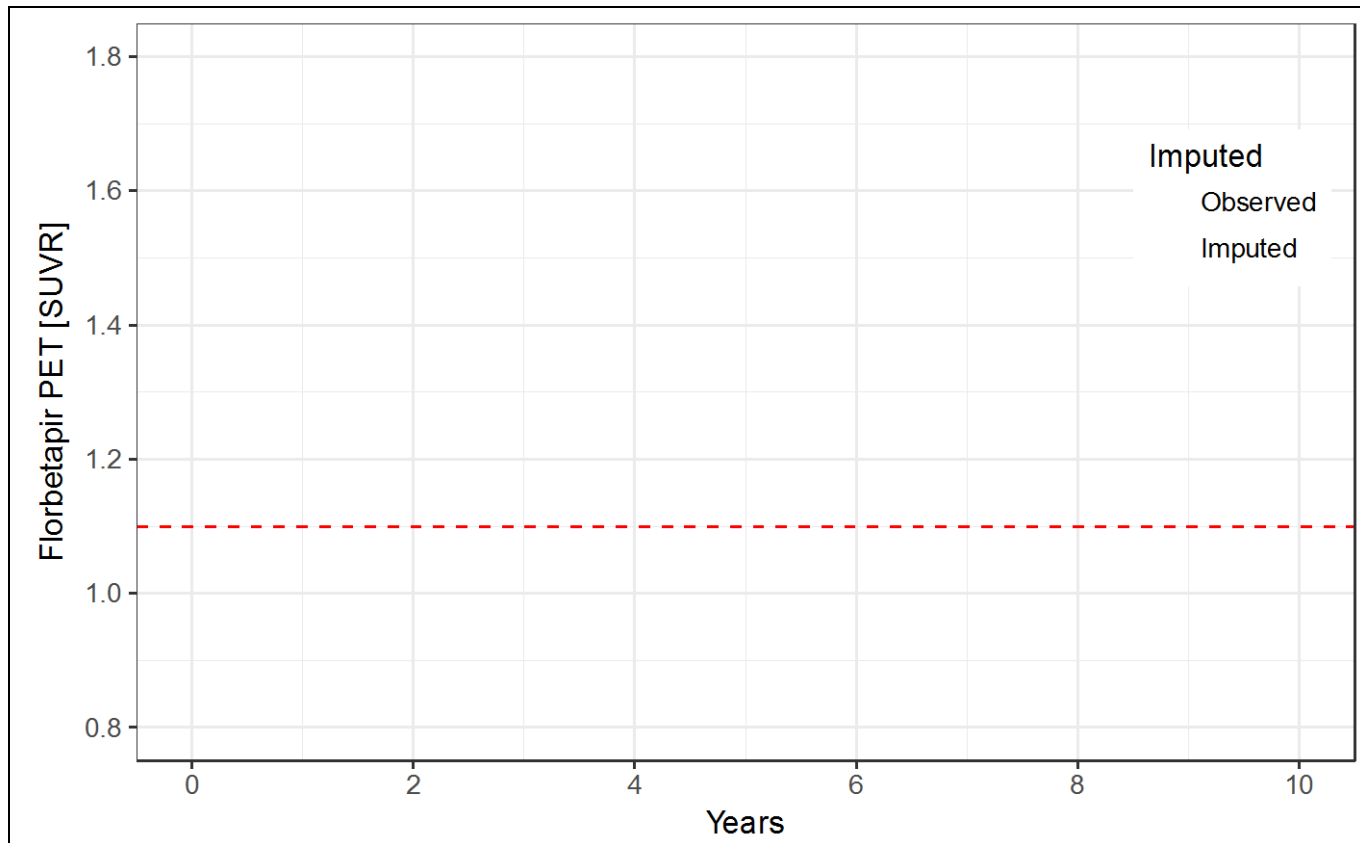

For individuals with follow-up florbetapir SUVR observations, but missing baseline florbetapir SUVR, values were imputed based on a linear mixed-effects model. The model was fit to all individuals with florbetapir data (n=375), but only those with missing baseline data are shown. The imputation is similar to the intercepts individual-specific ordinary least square regression, but with some shrinkage to the mean. A few individuals who are above the threshold for elevated amyloid (horizontal dashed line) at follow-up visits are classified as normal amyloid.

Abbreviations: SUVR, standardized uptake value ratio.

**eFigure 2.** Imputed Baseline PiB SUVR

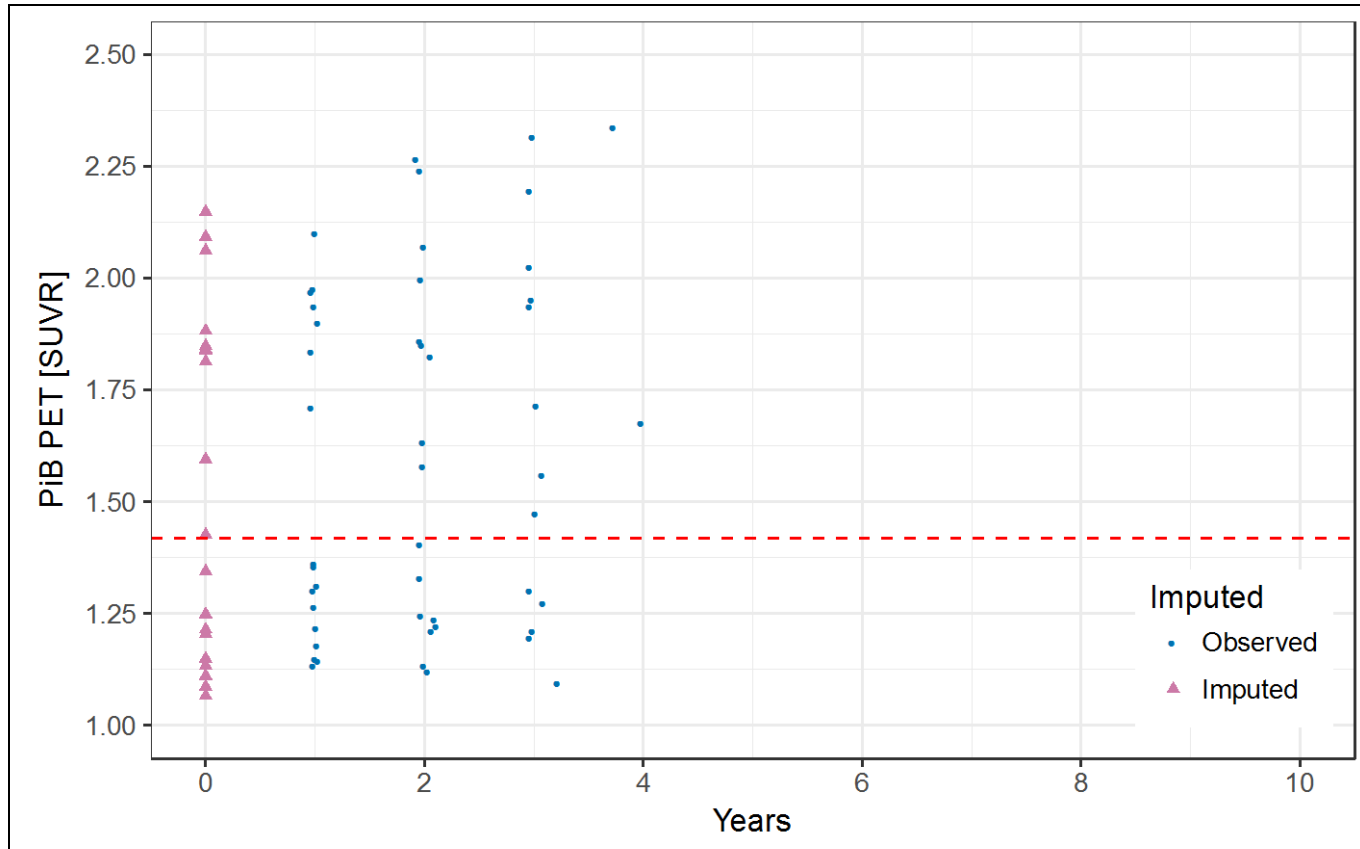

For individuals with follow-up PiB SUVR observations, but missing baseline PiB SUVR, values were imputed based on a linear mixed-effects model. The model was fit to all individuals with PiB data (n=19). No individuals with baseline subjective memory concerns received PiB PET imaging. The imputation is similar to the intercepts of individual-specific ordinary least square regression, but with some shrinkage to the mean. One individual who is above the threshold for abnormal amyloid (horizontal dashed line) at follow-up visits is classified as normal.

Abbreviation: PiB, Pittsburgh Compound B; SUVR, standardized uptake value ratio.

**eFigure 3.** Imputed Baseline Ventricular Volumes

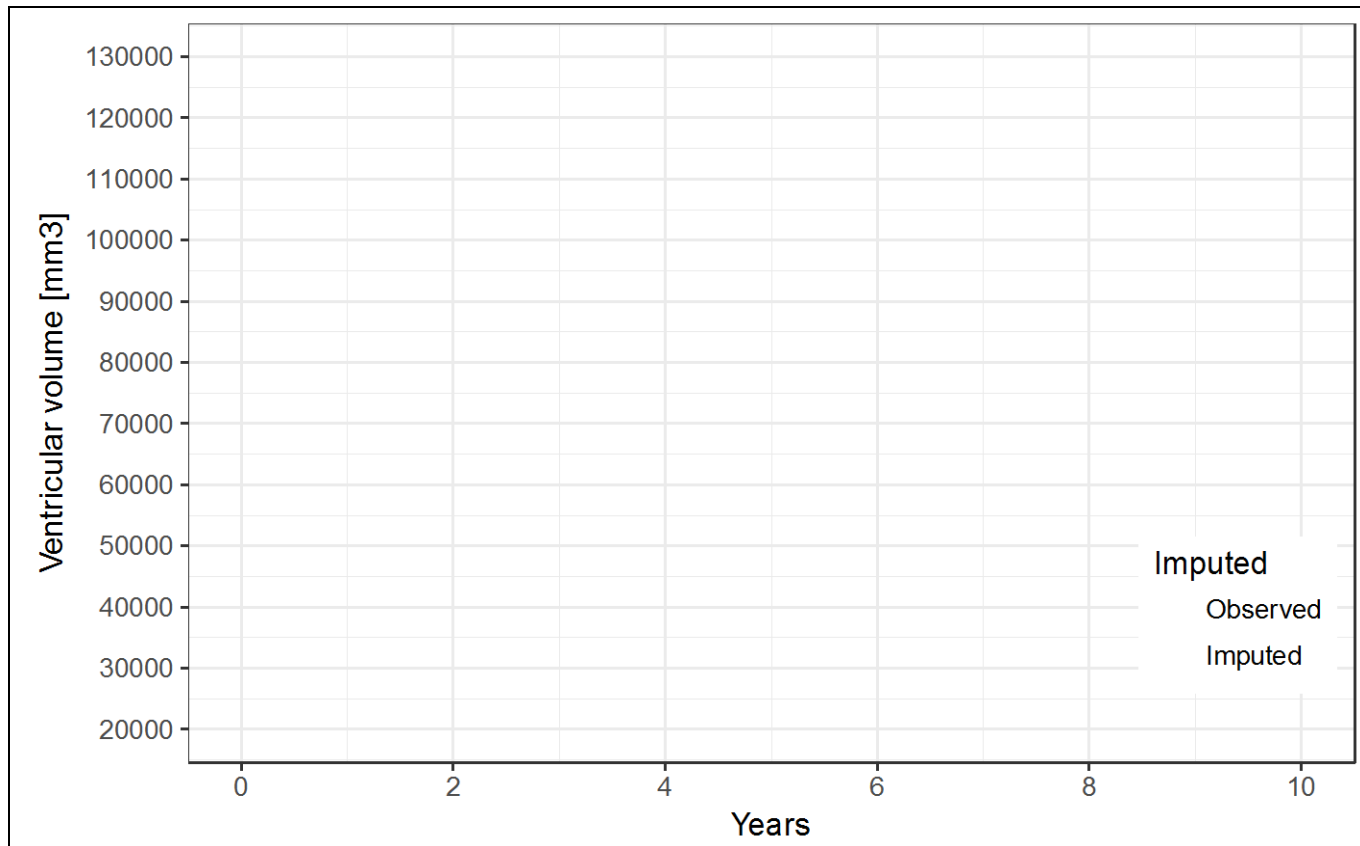

For individuals with follow-up volumetric magnetic resonance imaging, missing baseline values were imputed based on a linear mixed-effects model. The model was fit to all individuals with magnetic resonance imaging data (n=436), but only those with missing baseline data are shown. The imputation is similar to the intercepts of individual-specific ordinary least square regression, but with some shrinkage to the mean. These imputed baseline values are used as covariates in regression models of other outcomes.

**eFigure 4. Mean Cognitive Profiles Without Imputing Baseline Amyloid Status**

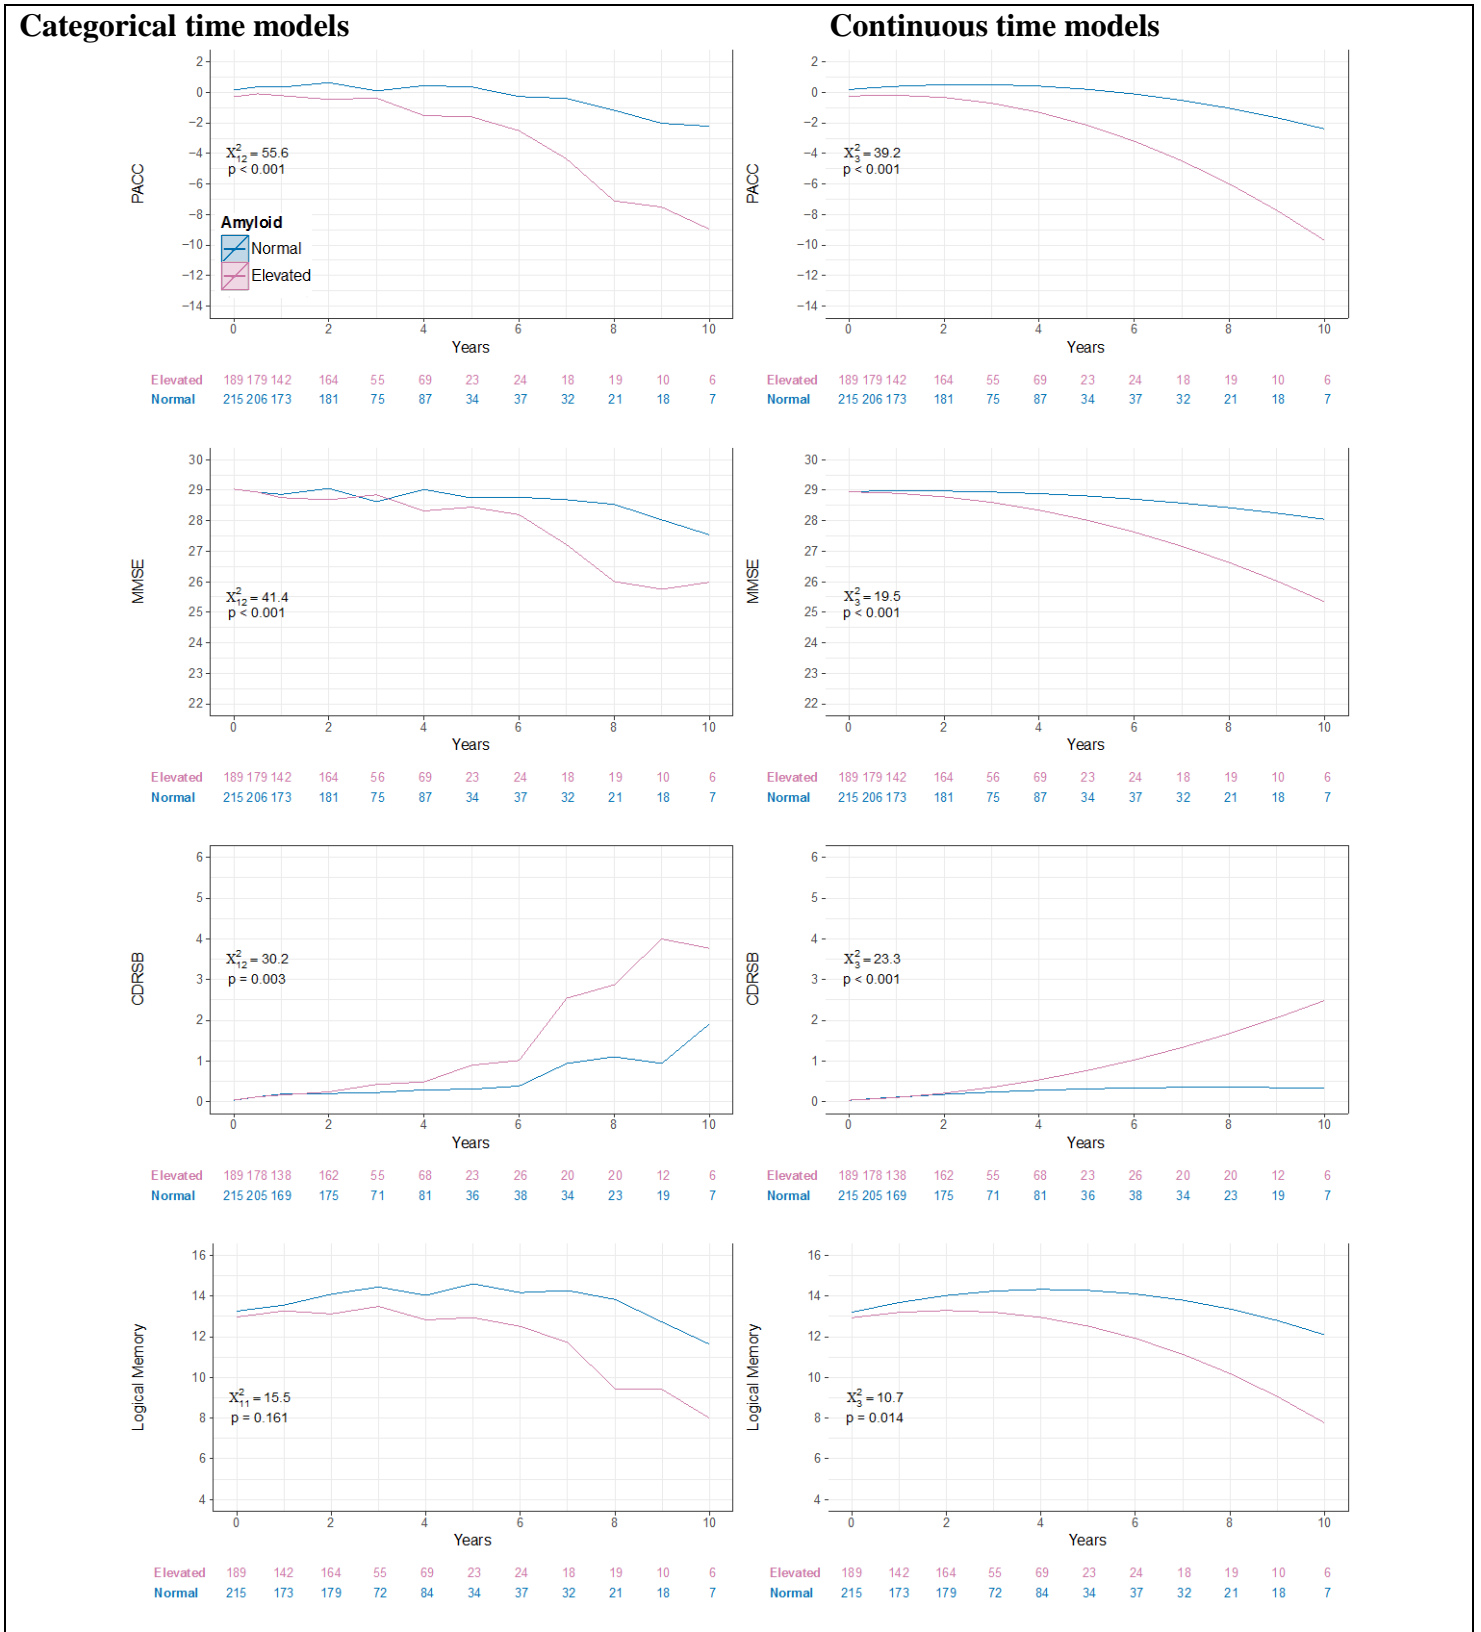

**eFigure 4. continued**

Only individuals with baseline Amyloid data are included in these analyses. Profiles are from linear mixed-effects models controlling for age at baseline (conditional on mean age, 74 years). The models depicted on the left treat time as a categorical variable, while those on the right treat time as continuous and include a quadratic term. P-values are from likelihood ratio tests comparing models with versus without Amyloid group. Shaded regions represent 95% confidence intervals. Dot sizes are proportional to the number of observations. The PACC is a sum of four baseline standardized Z-scores which decreases with worse performance. The MMSE ranges from zero (worst) to 30 (best) points, Logical Memory Delayed Recall range from zero (worst) to 25 (best) story units, and the CDRSB ranges from zero (best) to 18 (worst) points.

Abbreviations: PACC, Preclinical Alzheimer's Cognitive Composite; MMSE, Mini-Mental State Exam; CDRSB, Clinical Dementia Rating Sum of Boxes.



**eFigure 5. Progression Event Rates Without Imputing Amyloid Group**

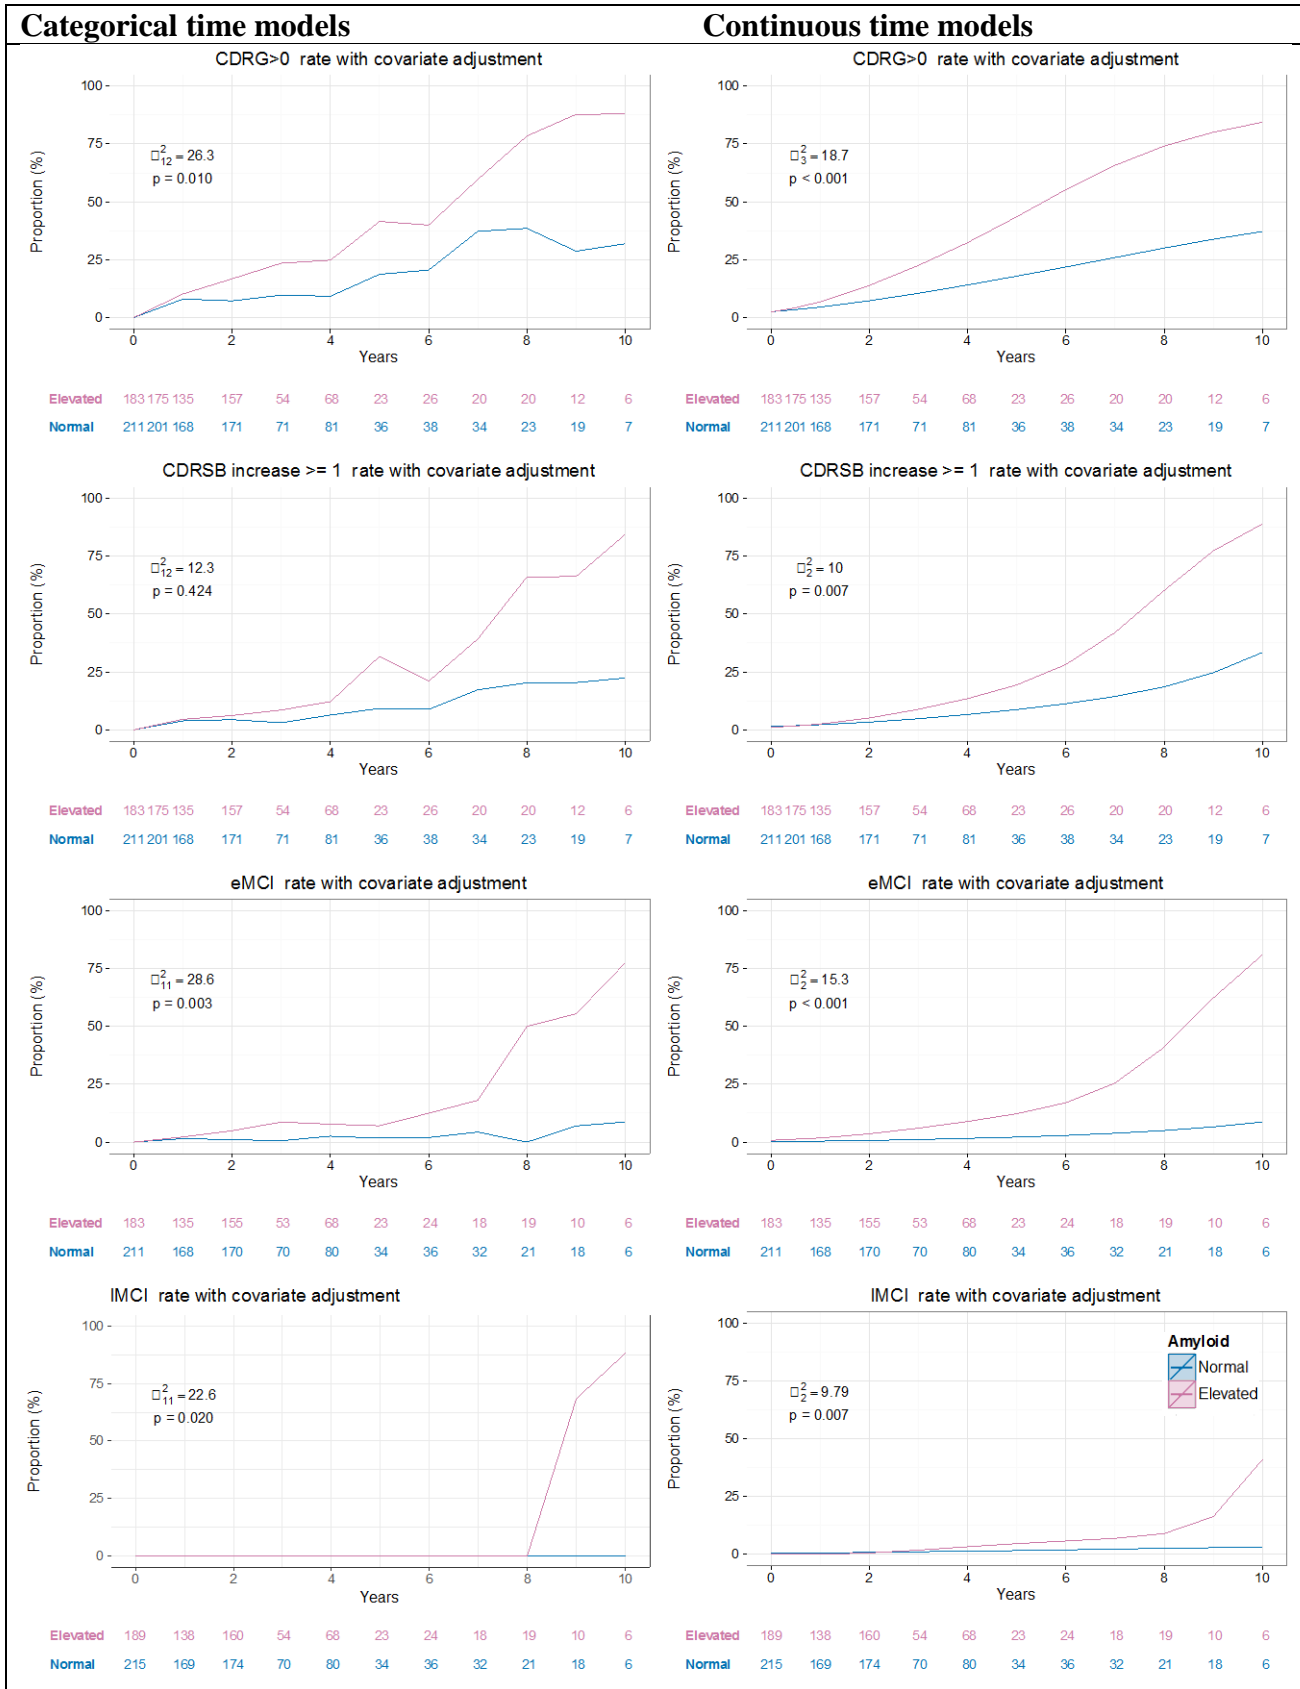

**eFigure 5.** *continued*

Only individuals with baseline Amyloid data are included in these analyses. Profiles are from logistic mixed-effects models controlling for baseline age (conditional on mean age, 74 years) and other covariates selected by AIC. P-values are from likelihood ratio tests comparing models with versus without Amyloid group. Shaded regions represent 95% confidence intervals. Dot sizes are proportional to the number of observations.

Abbreviations: CDRSB, Clinical Dementia Rating Global; CDRSB, Clinical Dementia Rating Sum of Boxes; EMCI, Early Mild Cognitive Impairment; LMCI, Late Mild Cognitive Impairment.

**eFigure 6.** Mean Cognitive Profiles Excluding Individuals With Subjective Memory Concerns at Baseline

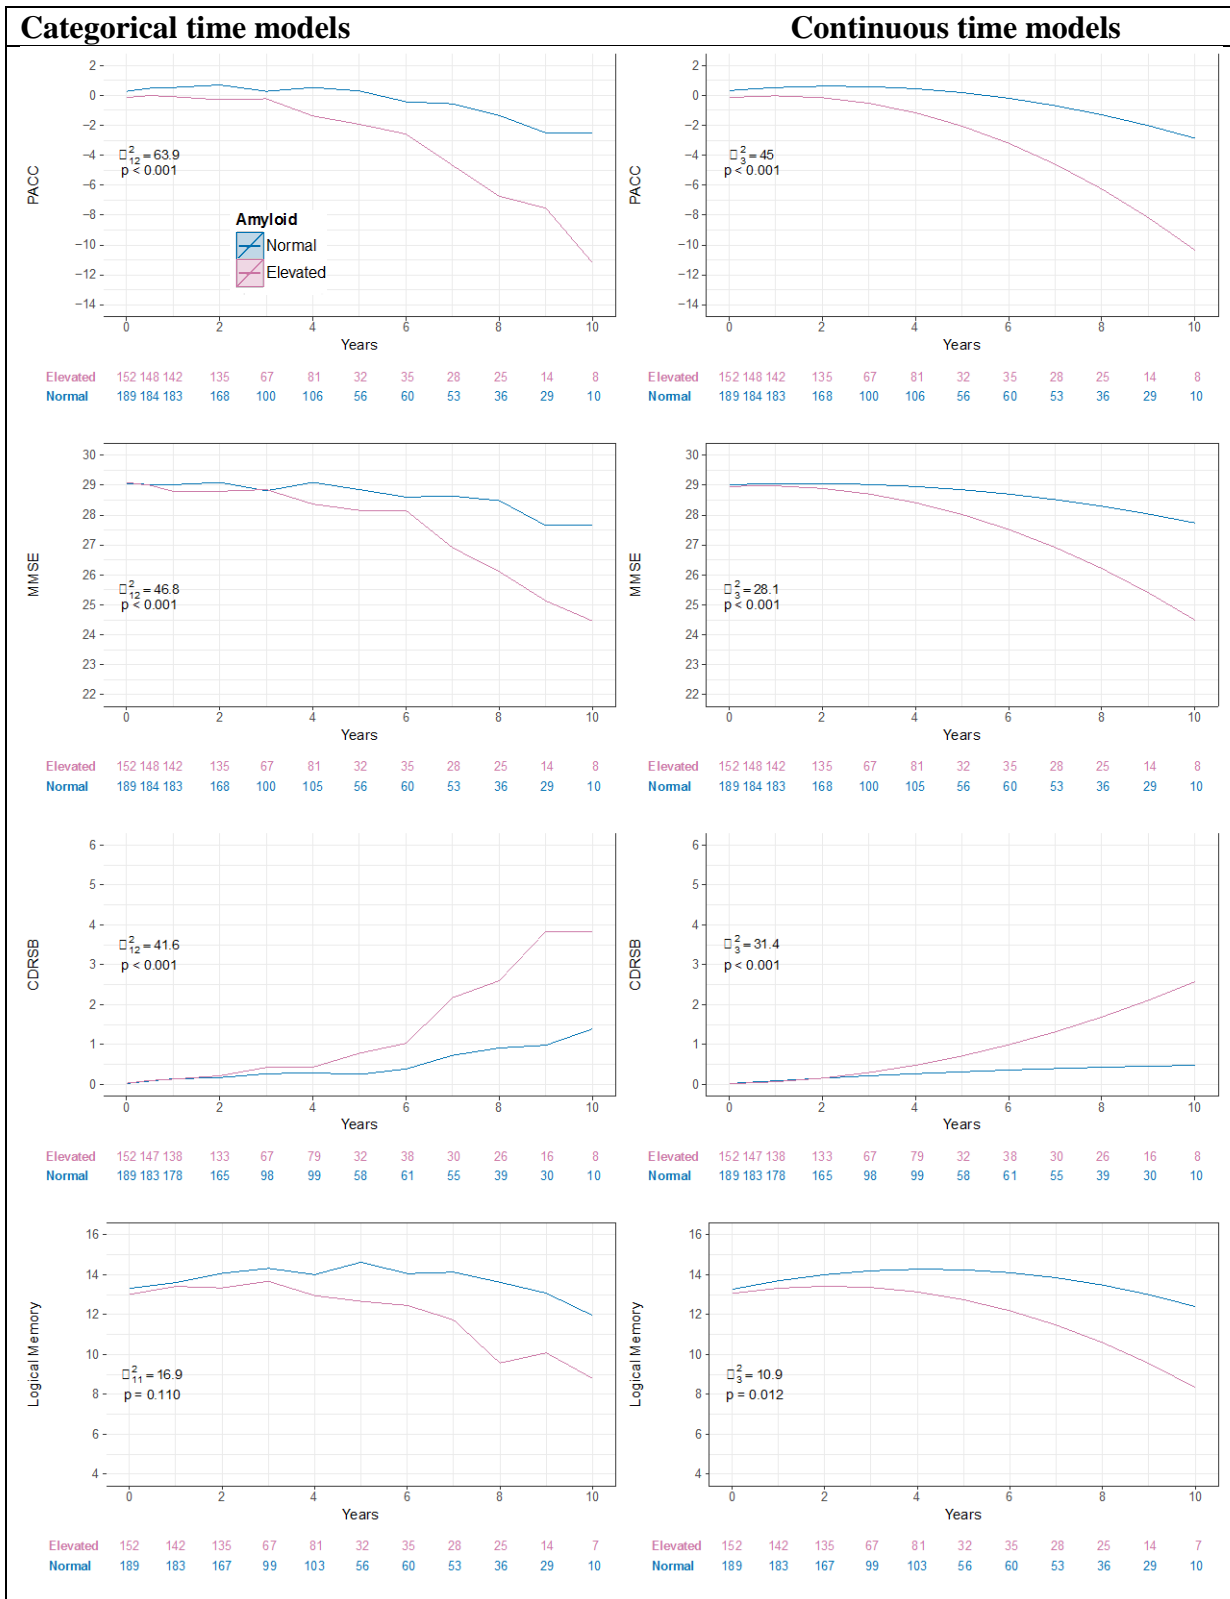

**eFigure 6.** *continued*

Profiles are from linear mixed-effects models controlling for age at baseline (conditional on mean age). The models depicted on the left treat time as a categorical variable, while those on the right treat time as continuous and include a quadratic term. P-values are from likelihood ratio tests comparing models with versus without Amyloid group. Shaded regions represent 95% confidence intervals. Dot sizes are proportional to the number of observations. The PACC is a sum of four baseline standardized Z-scores which decreases with worse performance. The MMSE ranges from zero (worst) to 30 (best) points, Logical Memory Delayed Recall range from zero (worst) to 25 (best) story units, and the CDRSB ranges from zero (best) to 18 (worst) points.

Abbreviations: PACC, Preclinical Alzheimer's Cognitive Composite; MMSE, Mini-Mental State Exam; CDRSB, Clinical Dementia Rating Sum of Boxes.

**eFigure 7. Progression Event Rates Excluding Individuals With Subjective Memory Concerns at Baseline**

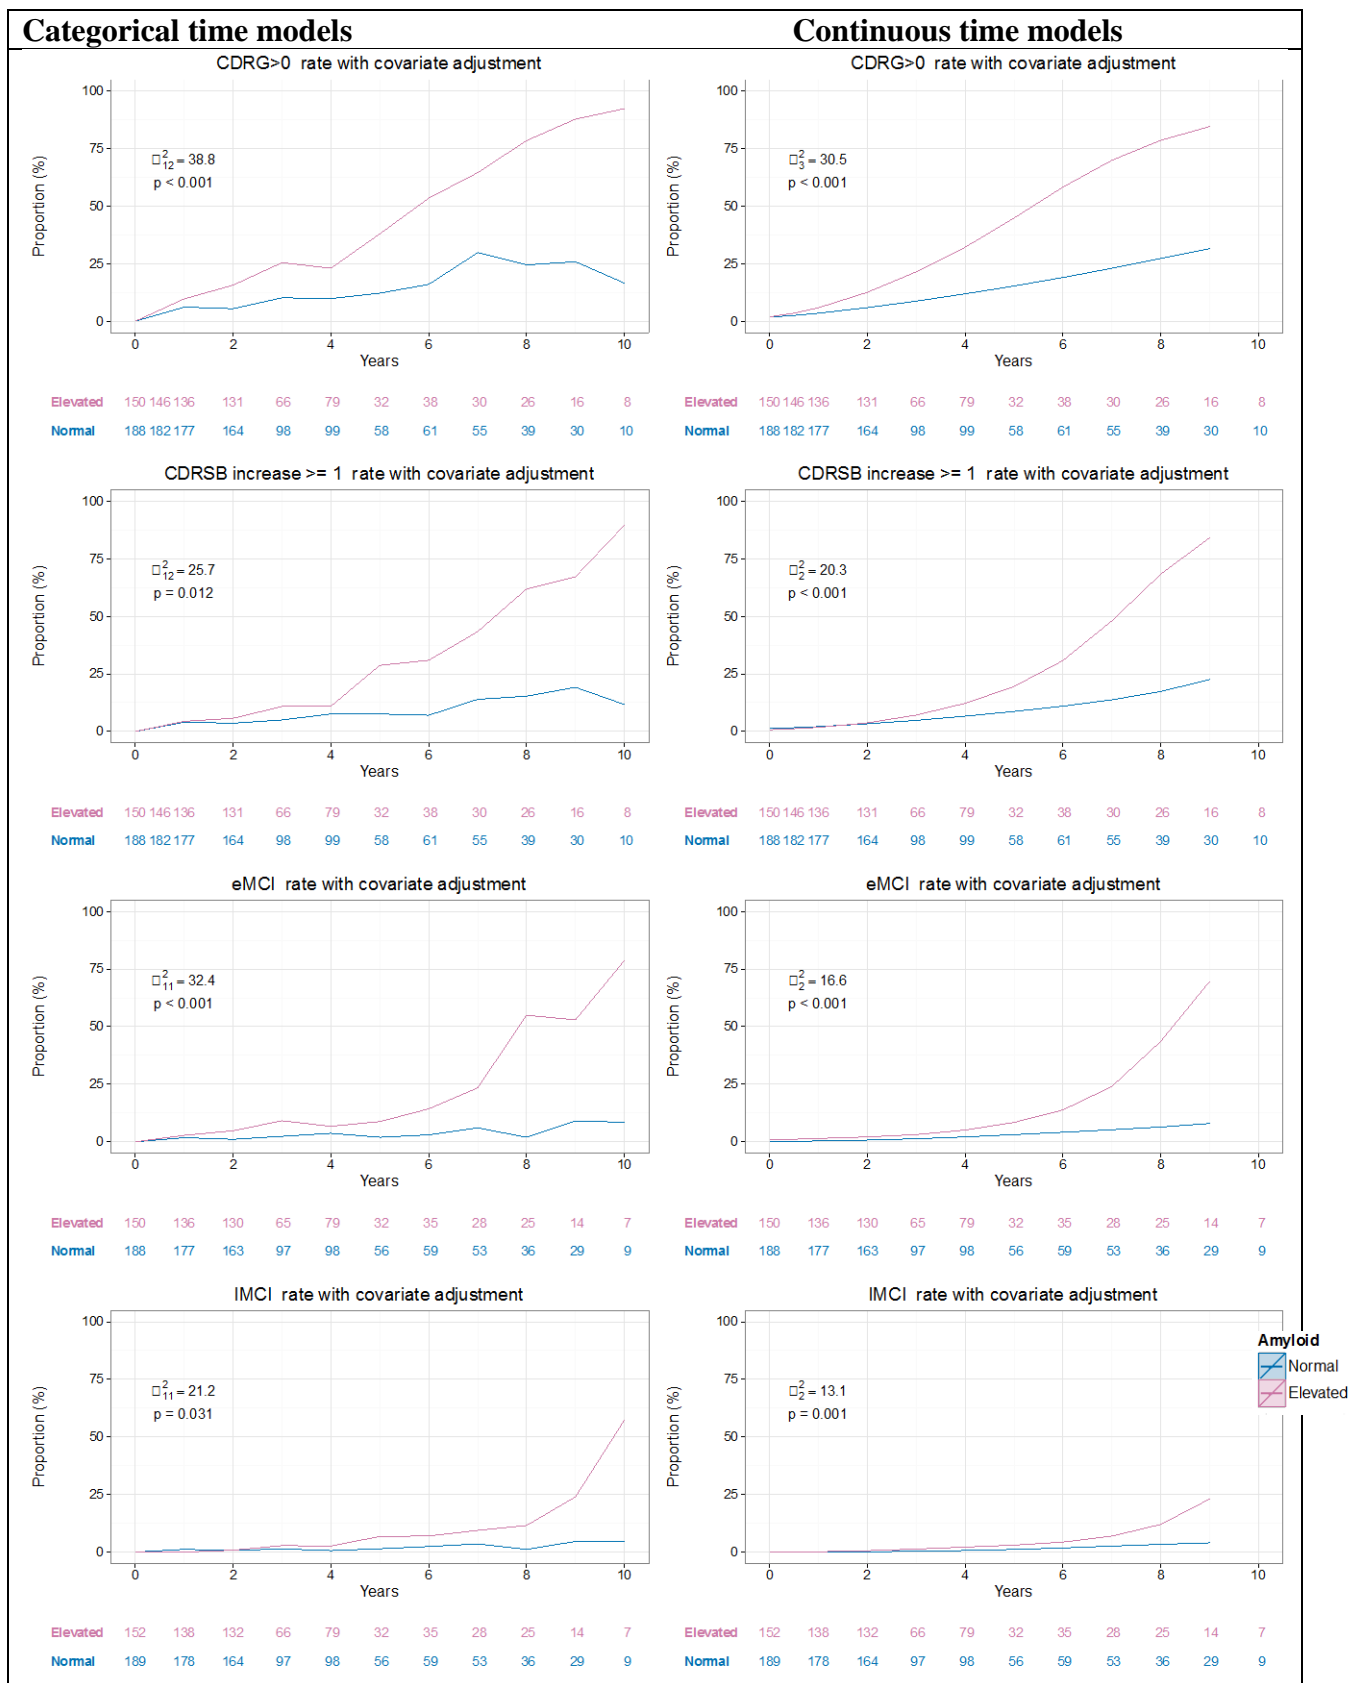

**eFigure 7. continued**

Profiles are from logistic mixed-effects models controlling for baseline age (conditional on mean age). P-values are from likelihood ratio tests comparing models with versus without Amyloid group. Shaded regions represent 95% confidence intervals. Dot sizes are proportional to the number of observations.

Abbreviations: CDRSB, Clinical Dementia Rating Global; CDRSB, Clinical Dementia Rating Sum of Boxes; EMCI, Early Mild Cognitive Impairment; LMCI, Late Mild Cognitive Impairment.

**eFigure 8. Mean Cognitive Profiles Controlling for Age Only**

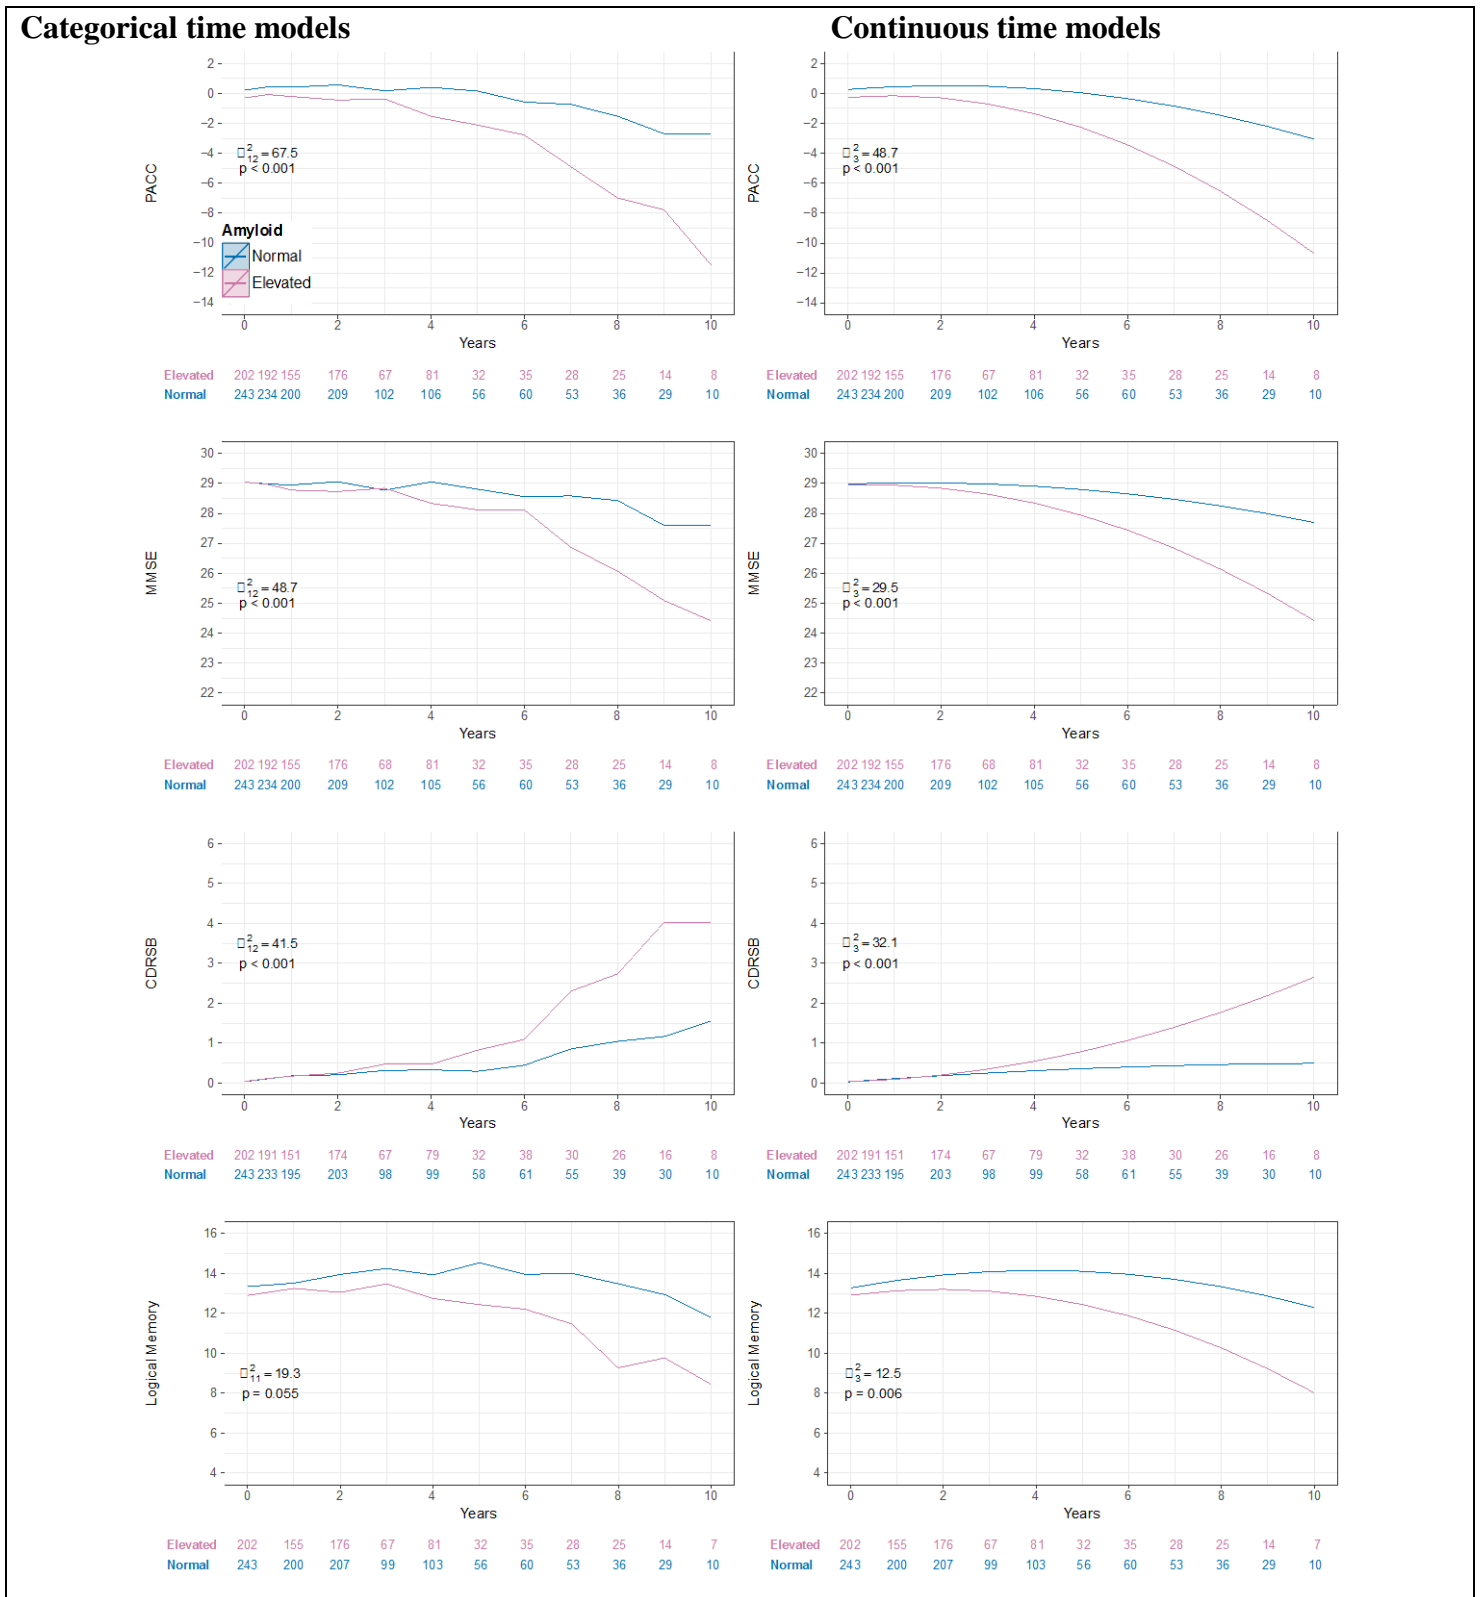

**eFigure 8.** *continued*

Profiles are from linear mixed-effects models controlling for age at baseline (conditional on mean age). The models depicted on the left treat time as a categorical variable, while those on the right treat time as continuous and include a quadratic term. P-values are from likelihood ratio tests comparing models with versus without Amyloid group. Shaded regions represent 95% confidence intervals. Dot sizes are proportional to the number of observations. The PACC is a sum of four baseline standardized Z-scores which decreases with worse performance. The MMSE ranges from zero (worst) to 30 (best) points, Logical Memory Delayed Recall range from zero (worst) to 25 (best) story units, and the CDRSB ranges from zero (best) to 18 (worst) points.

Abbreviations: PACC, Preclinical Alzheimer's Cognitive Composite; MMSE, Mini-Mental State Exam; CDRSB, Clinical Dementia Rating Sum of Boxes.



**eFigure 9. Progression Event Rates Controlling for Age Only**

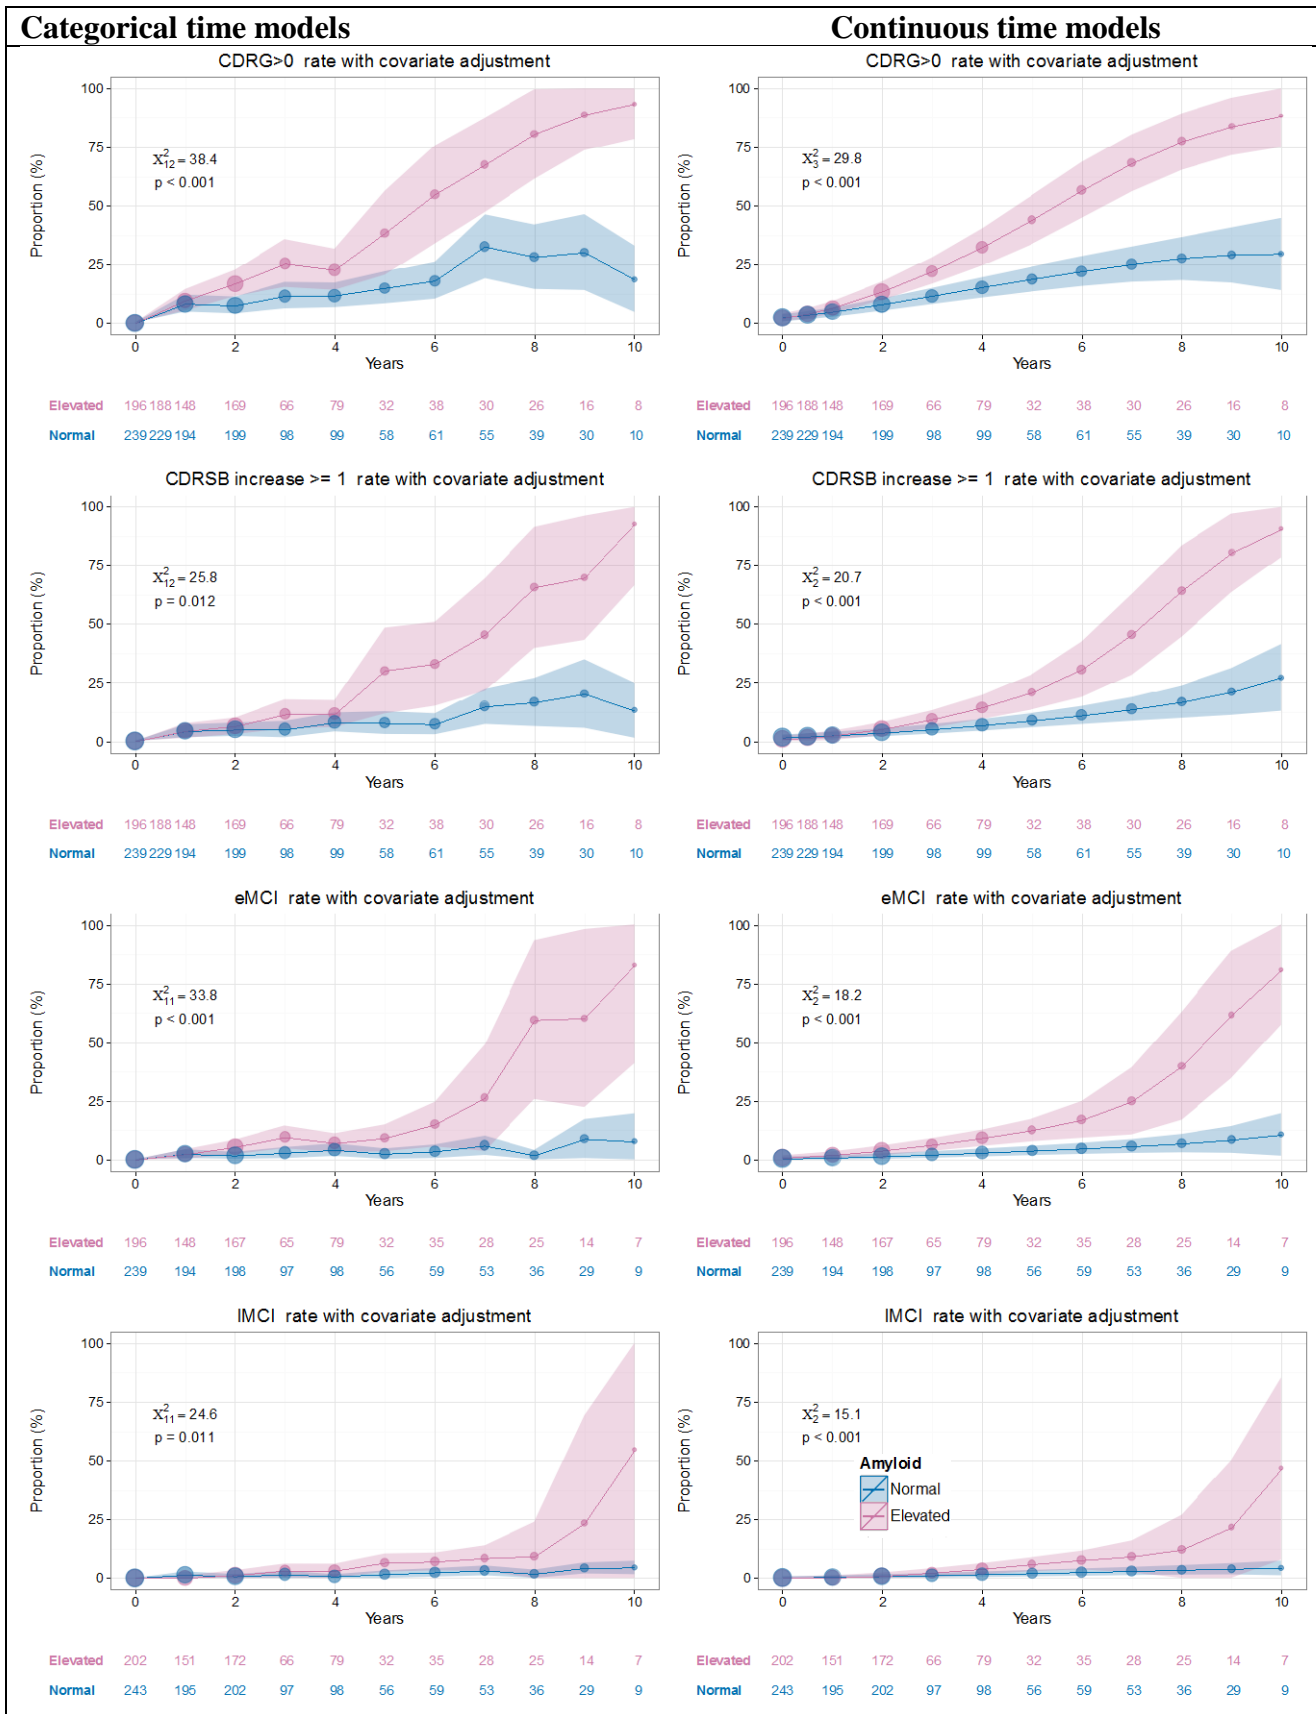

**eFigure 9.** *continued*

Profiles are from logistic mixed-effects models controlling for baseline age (conditional on mean age). P-values are from likelihood ratio tests comparing models with versus without Amyloid group. Shaded regions represent 95% confidence intervals. Dot sizes are proportional to the number of observations.

Abbreviations: CDRSB, Clinical Dementia Rating Global; CDRSB, Clinical Dementia Rating Sum of Boxes; EMCI, Early Mild Cognitive Impairment; LMCI, Late Mild Cognitive Impairment.

**eFigure 10. PACC Change**

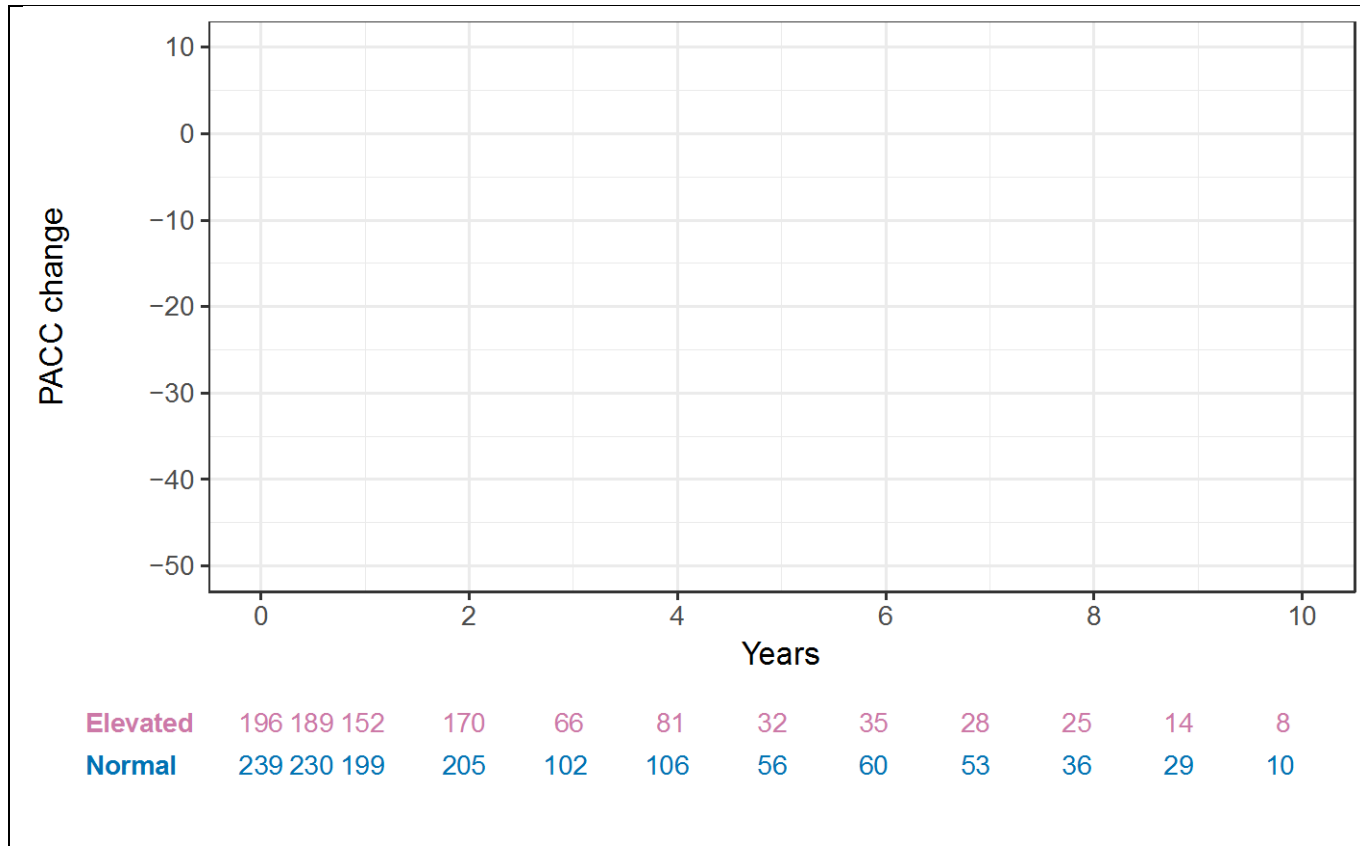

Raw observations of PACC change plotted by Amyloid group. Numbers along the bottom are observation counts for each study visit. The PACC is a sum of four baseline standardized Z-scores which decreases with worse performance.

Abbreviation: PACC, Preclinical Alzheimer's Cognitive Composite.

**eFigure 11.** Logistic Mixed-Effects Models Controlling for Age

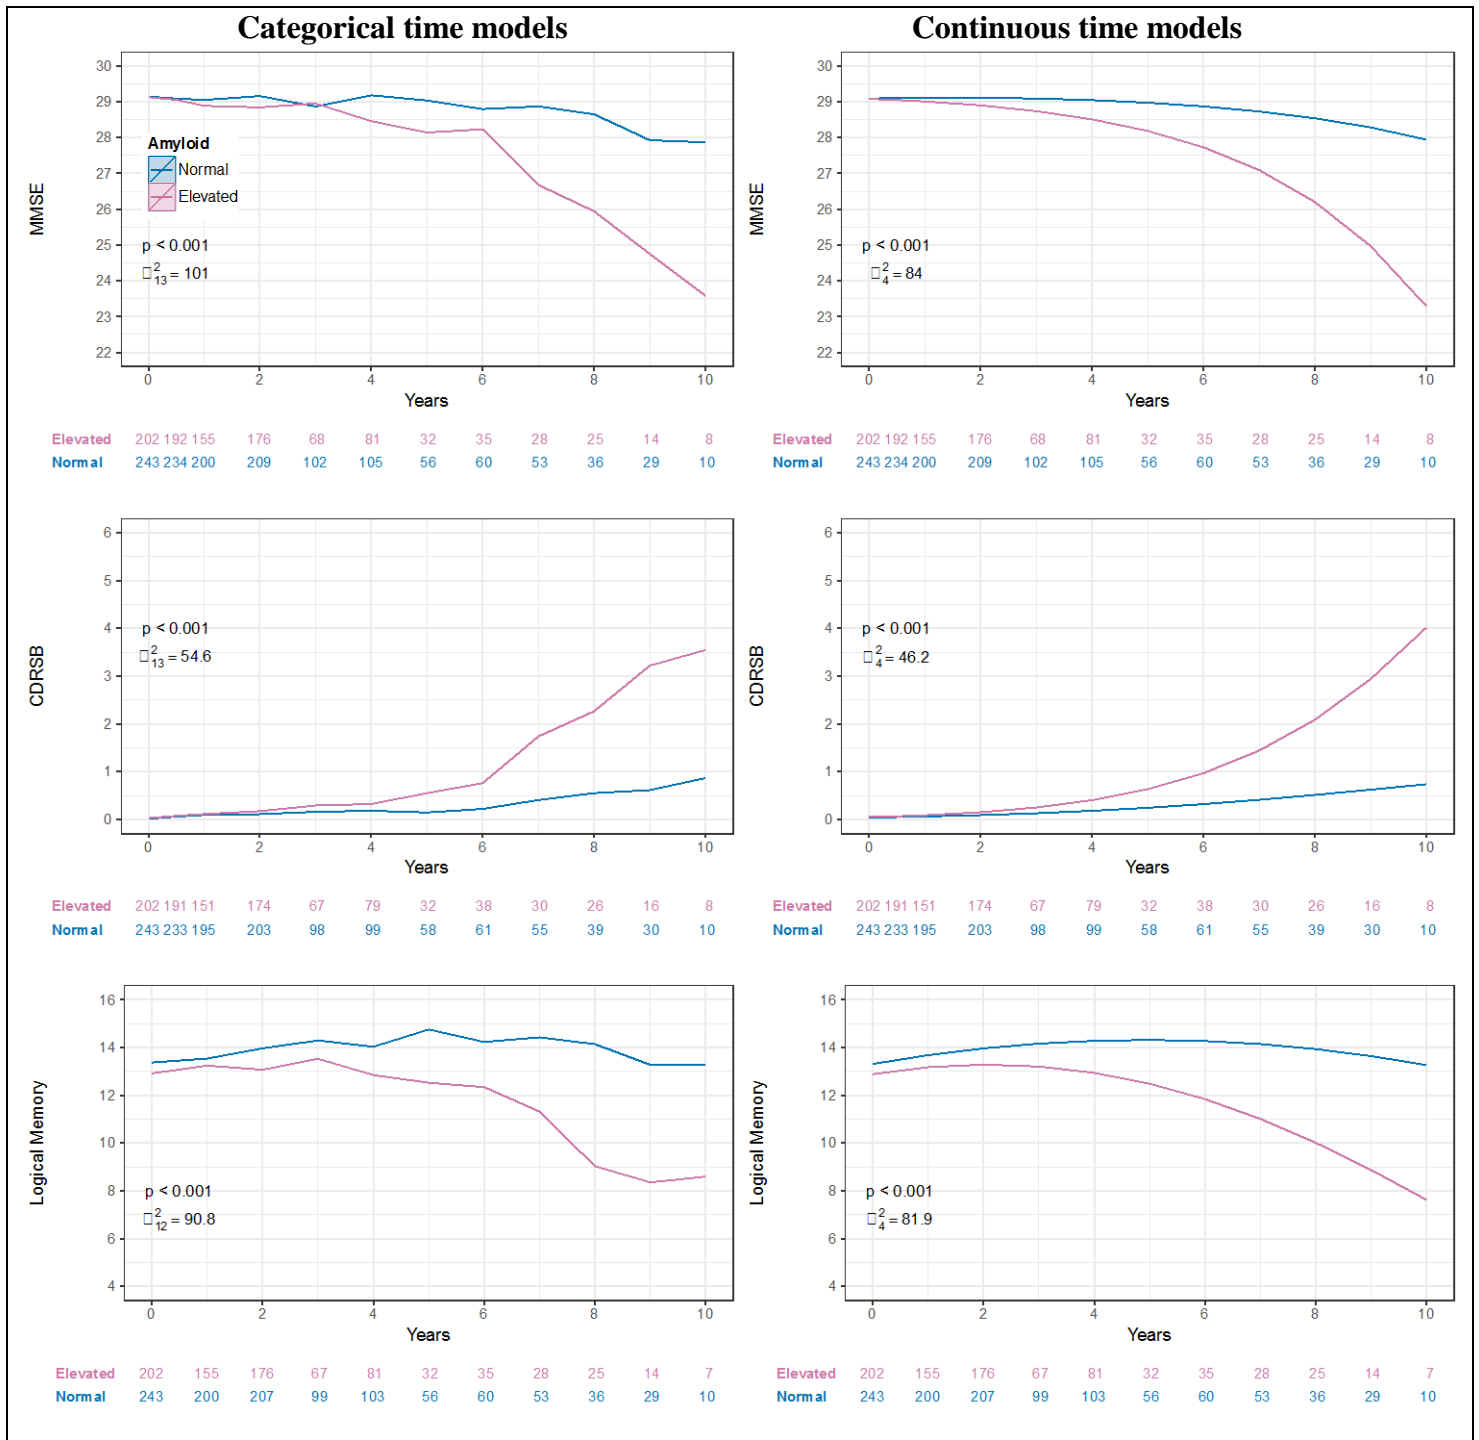

Profiles are from logistic mixed-effects models controlling for baseline age (conditional on mean age). The models depicted on the left treat time as a categorical variable, while those on the right treat time as continuous and include a quadratic term. P-values are from likelihood ratio tests comparing models with versus without Amyloid group. Shaded regions represent 95% confidence intervals. The MMSE ranges from zero (worst) to 30 (best) points, Logical Memory Delayed Recall range from zero (worst) to 25 (best) story units, and the CDRSB ranges from zero (best) to 18 (worst) points.

Abbreviations: MMSE, Mini-Mental State Exam; CDRSB, Clinical Dementia Rating Sum of Boxes.

**eFigure 12.** Apolipoprotein E ε4 Allele Group Mean PACC Profiles for Those With Elevated Amyloid

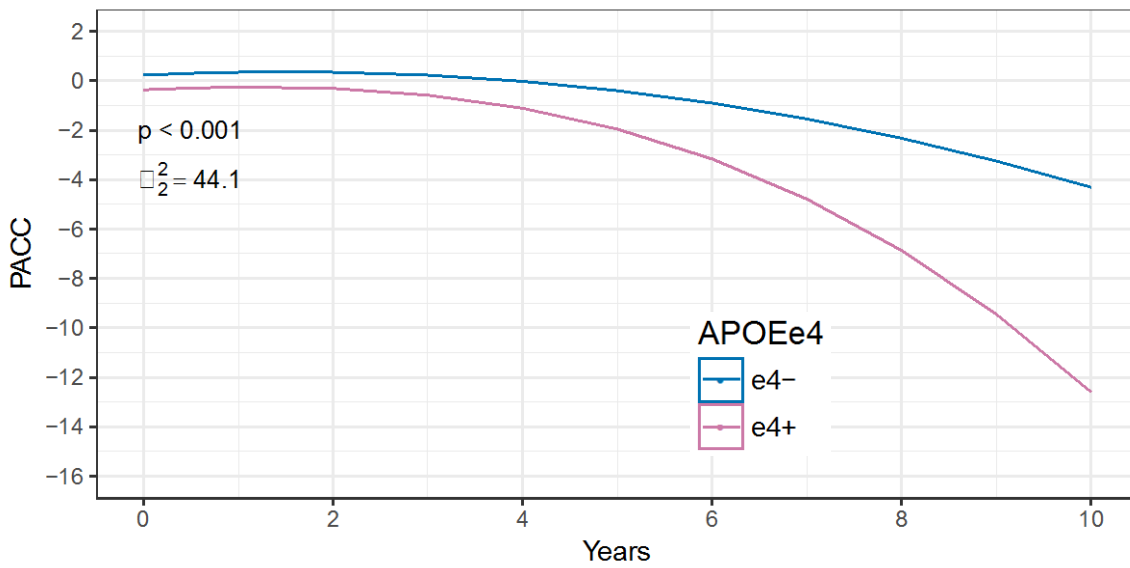

|     | 0   | 1   | 2   | 3   | 4   | 5   | 6  | 7  | 8  | 9  | 10 |    |
|-----|-----|-----|-----|-----|-----|-----|----|----|----|----|----|----|
| e4+ | 123 | 118 | 94  | 105 | 41  | 49  | 21 | 23 | 19 | 16 | 8  | 2  |
| e4- | 312 | 301 | 257 | 270 | 127 | 138 | 67 | 72 | 62 | 45 | 35 | 16 |

The profiles are from linear mixed-effects models, with time as a continuous measure, controlling for age and additional baseline covariates (education, ventricular volume, and sex) selected by Akaike Information Criterion. Shaded regions represent 95% confidence intervals. Dot sizes are proportional to the number of observations. The PACC is a sum of four baseline standardized Z-scores which decreases with worse performance.

Abbreviation: PACC, Preclinical Alzheimer’s Cognitive Composite.

**eFigure 13.** Logistic Mixed-Effects Model of Anti-Dementia Medication Use Controlling for Age

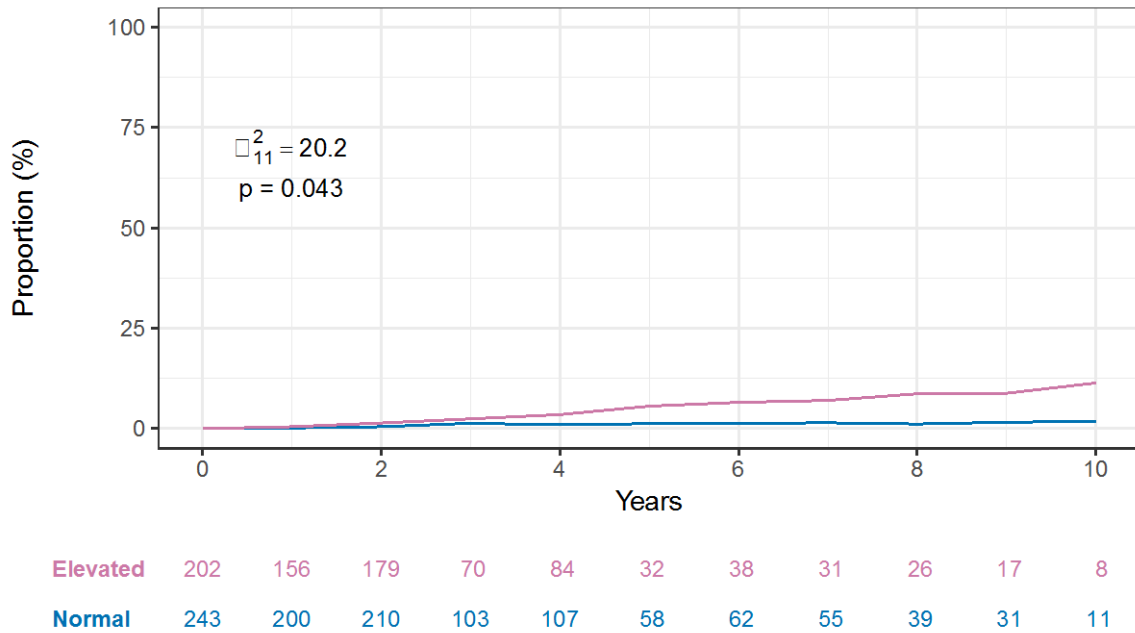

Anti-dementia medications included donepezil, tacrine, rivastigmine, memantine, or galantamine. Profiles are from logistic mixed-effects models controlling for baseline age (conditional on mean age). The model treats time as a categorical variable. P-value is from a likelihood ratio test comparing a model with versus without Amyloid group. Shaded regions represent 95% confidence intervals. Dot sizes are proportional to the number of observations

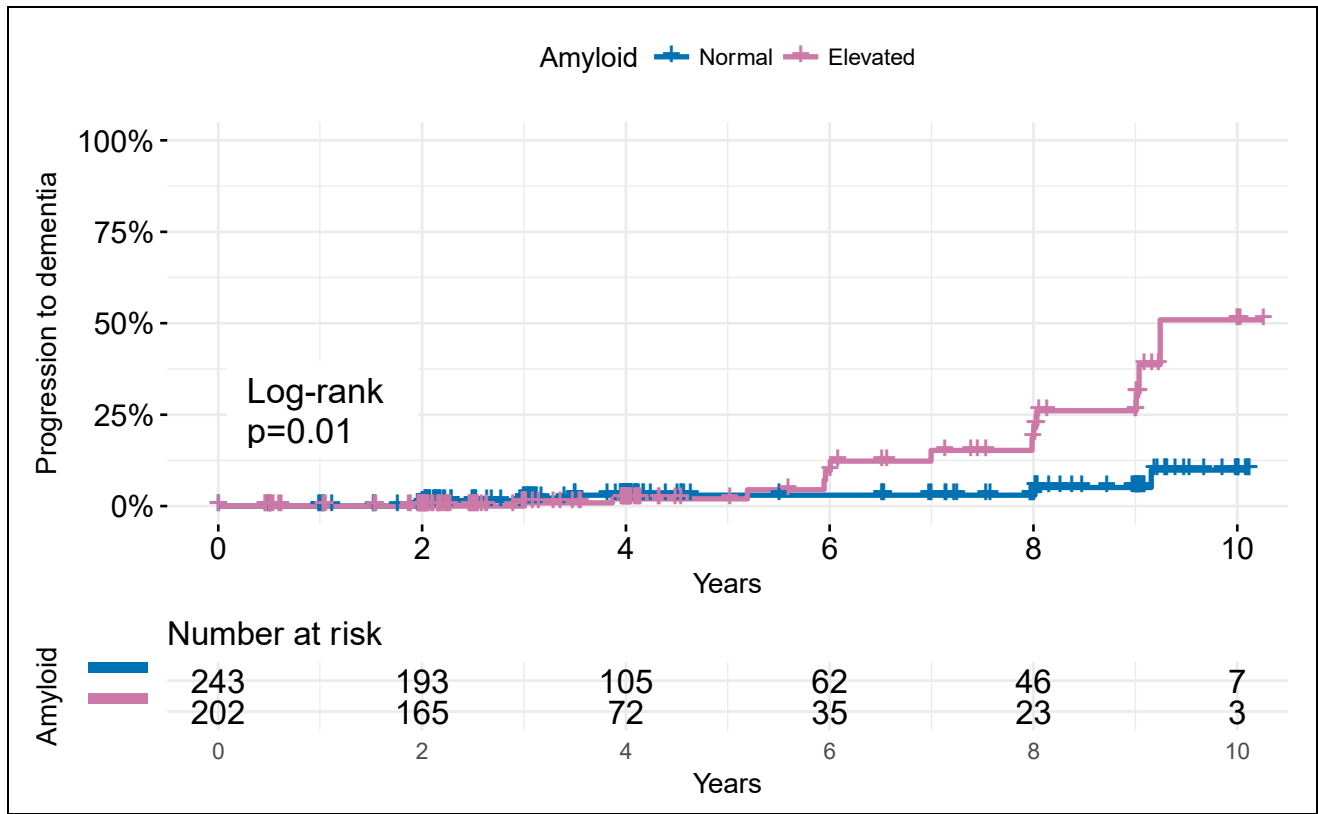

**Figure 14. Kaplan-Meier plot of cumulative rate of progression to dementia.** The log-rank test ( $p=0.01$ ) indicates a significant difference between amyloid groups in the time to dementia. Shaded regions represent the 95% confidence intervals. Marks (+) indicate censored observations.
